# Supplementary material
Source: MDPI journal article supplement (https://www.mdpi.com/2674-1334/1/4/20)
Supplement: s1 [file s1]

Archive with 7 entries (7 files):
- Supplementary_material_1.xls
- Supplementary_material_2.xlsx
- Supplementary_material_3.fasta
- Supplementary_material_4.pdf
- Supplementary_material_5.pdf
- Supplementary_material_6_PS.fasta
- Supplementary_material_7_NS.fasta
