# Supplementary material
Source: MDPI journal article supplement (https://www.mdpi.com/2674-1334/1/4/20)
Supplement: s1 [file s1]

## Supplementary material 5

Figure 1. UhpT protein (P0AGC0) colored by pLDDT score from AlphaFold2

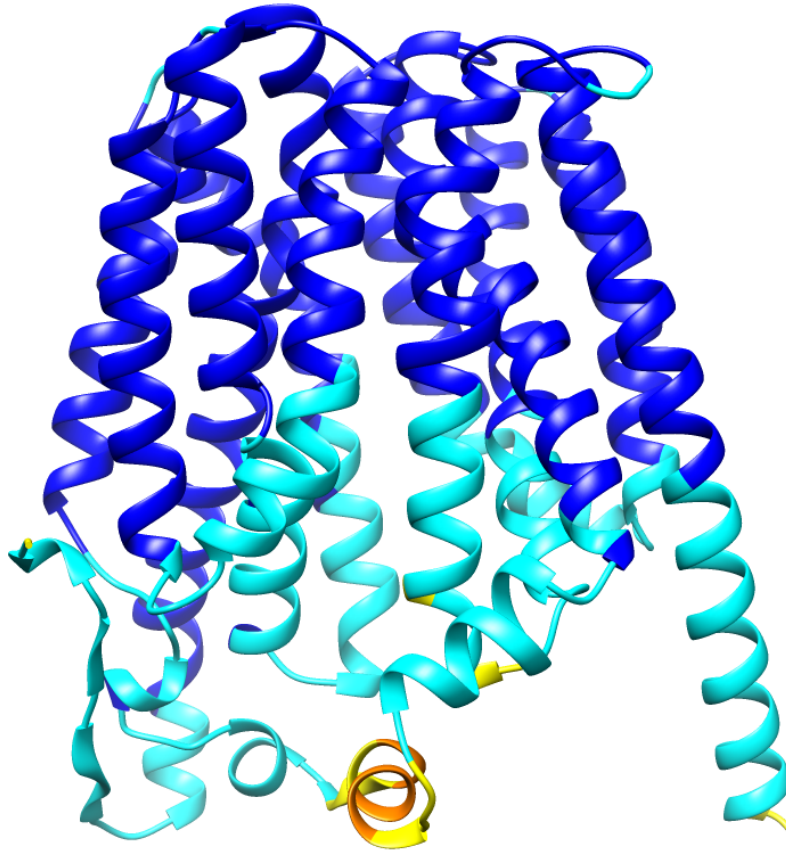

The pLDDT score is a per-residue confidence score provided from AlphaFold2. It spans from 0 to 100 and it is classified as follow: Very high (pLDDT > 90; blue); Confident (pLDDT between 90 and 70; cyan); Low (pLDDT between 70 and 50; yellow); Very low (pLDDT < 50; orange).

**Figure 2. Binding pocket highlighted and colored by pLDDT score**

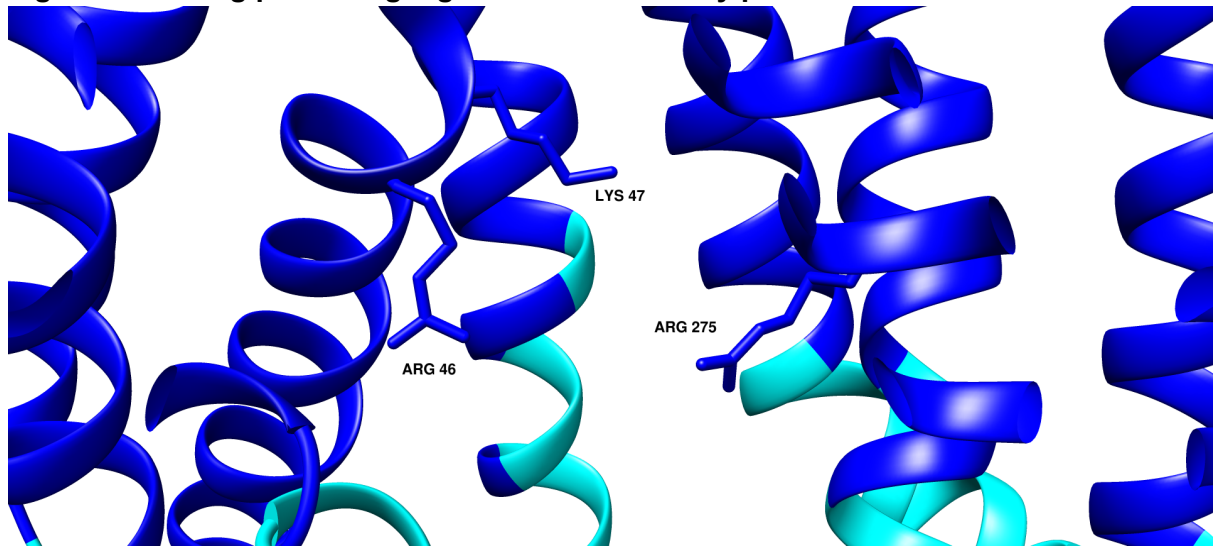

The residues responsible for glycerol-3-P binding are highlighted. The pLDDT is classified as “Very high” for all residues (95.41 for both ARG46 and ARG275 and 94.65 for LYS47).

**Figure 3. ASP90 highlighted and colored by pLDDT score**

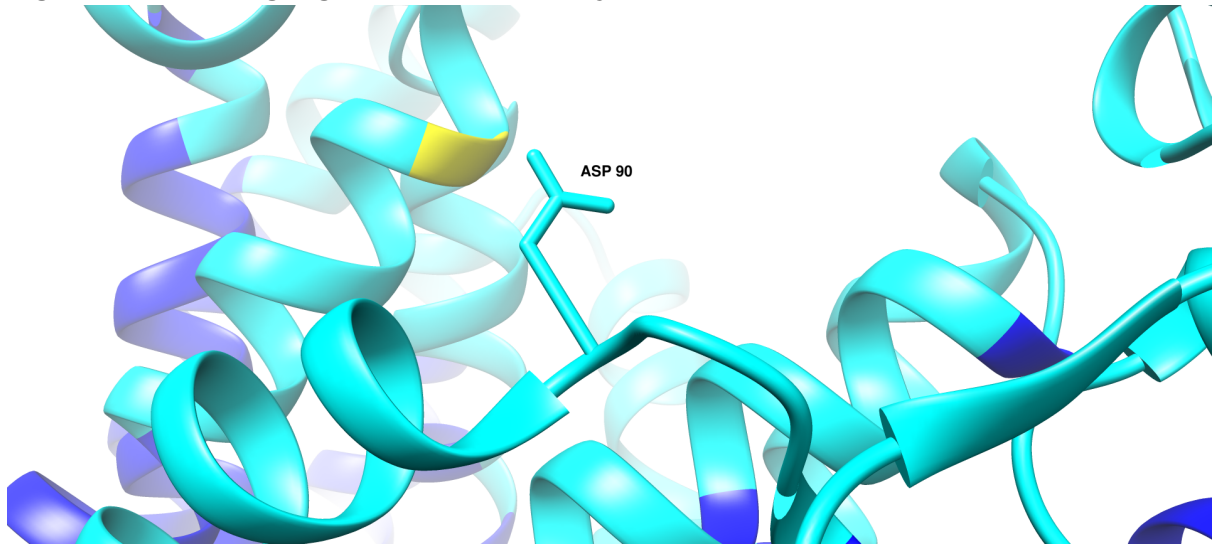

ASP90 is highlighted and the pLDDT score is 76.05, classified as “Confident”. According to the model, the confidence score is clearly lower than central pore. This results in a less accurate modeling with *g/pt\_2*, with a distance of 6.57 Å between the asparagines of the two structures.
