# Supplementary material
Source: MDPI journal article supplement (https://www.mdpi.com/2674-1334/1/4/20)
Supplement: s1 [file s1 › Supplementary_material_1.xls]

## Sheet: Supplementary_material_1
0101		0201	02BN01	0302		0401		0501		0902		1001		1102		1201		1302		1402		1501		1602		1703		1801		1901		2001		2102		2201		2301		2402
Seq. id	Seq. name	Seq. id	Seq. name	Seq. id	Seq. name	Seq. id	Seq. name	Seq. id	Seq. name	Seq. id	Seq. name	Seq. id	Seq. name	Seq. id	Seq. name	Seq. id	Seq. name	Seq. id	Seq. name	Seq. id	Seq. name	Seq. id	Seq. name	Seq. id	Seq. name	Seq. id	Seq. name	Seq. id	Seq. name	Seq. id	Seq. name	Seq. id	Seq. name	Seq. id	Seq. name	Seq. id	Seq. name	Seq. id	Seq. name	Seq. id	Seq. name
--force_04175	Glycerol-3-phosphate transporter	--force_01030	Glycerol-3-phosphate transporter	--force_01028	Glycerol-3-phosphate transporter	--force_00996	Glycerol-3-phosphate transporter	--force_00562	Glycerol-3-phosphate transporter	--force_01509	Glycerol-3-phosphate transporter	--force_01825	Glycerol-3-phosphate transporter	--force_00618	Glycerol-3-phosphate transporter	--force_02585	Glycerol-3-phosphate transporter	--force_04525	Glycerol-3-phosphate transporter	--force_04554	Glycerol-3-phosphate transporter	--force_05510	Glycerol-3-phosphate transporter	--force_05348	Glycerol-3-phosphate transporter	--force_01933	Glycerol-3-phosphate transporter	--force_02728	Glycerol-3-phosphate transporter	--force_03134	Glycerol-3-phosphate transporter	--force_02138	Glycerol-3-phosphate transporter	--force_02206	Glycerol-3-phosphate transporter	--force_01427	Glycerol-3-phosphate transporter	--force_00883	Glycerol-3-phosphate transporter	--force_01812	Glycerol-3-phosphate transporter
--force_01965	Sugar efflux transporter B	--force_05337	Sugar efflux transporter B	--force_05599	Sugar efflux transporter B	--force_03852	Sugar efflux transporter B	--force_05198	Sugar efflux transporter B	--force_02086	Sugar efflux transporter B	--force_05191	Sugar efflux transporter B	--force_04950	Sugar efflux transporter B	--force_01812	Sugar efflux transporter B	--force_02293	Sugar efflux transporter B	--force_05450	Sugar efflux transporter B	--force_04823	Sugar efflux transporter B	--force_04151	Sugar efflux transporter B	--force_00811	Sugar efflux transporter B	--force_03880	Sugar efflux transporter B	--force_02223	Sugar efflux transporter B	--force_00031	Sugar efflux transporter B	--force_05311	Sugar efflux transporter B	--force_03119	Sugar efflux transporter B	--force_05272	Sugar efflux transporter B	--force_00029	Sugar efflux transporter B
--force_04490	putative galactarate transporter	--force_05324	Hexuronate transporter	--force_05586	Hexuronate transporter	--force_04965	putative galactarate transporter	--force_05632	putative galactarate transporter	--force_04282	putative galactarate transporter	--force_03321	putative galactarate transporter	--force_00945	putative galactarate transporter	--force_04006	putative galactarate transporter	--force_05280	putative galactarate transporter	--force_04006	putative galactarate transporter	--force_02895	putative galactarate transporter	--force_04053	putative galactarate transporter	--force_04135	putative galactarate transporter	--force_04444	putative galactarate transporter	--force_04071	putative galactarate transporter	--force_01134	putative galactarate transporter	--force_04286	putative galactarate transporter	--force_01603	putative galactarate transporter	--force_04563	putative galactarate transporter	--force_04729	putative galactarate transporter
--force_01946	Hexuronate transporter	--force_05104	Hexuronate transporter	--force_04680	Hexuronate transporter	--force_03865	Hexuronate transporter	--force_05217	Hexuronate transporter	--force_02073	Hexuronate transporter	--force_05172	Hexuronate transporter	--force_04969	Hexuronate transporter	--force_01825	Hexuronate transporter	--force_02280	Hexuronate transporter	--force_05629	Hexuronate transporter	--force_04804	Hexuronate transporter	--force_04132	Hexuronate transporter	--force_00798	Hexuronate transporter	--force_03893	Hexuronate transporter	--force_02204	Hexuronate transporter	--force_00050	Hexuronate transporter	--force_05292	Hexuronate transporter	--force_03131	Hexuronate transporter	--force_05285	Hexuronate transporter	--force_00042	Hexuronate transporter
--force_02480	Hexuronate transporter	--force_03296	Inner membrane transport protein YdhP	--force_03702	Inner membrane transport protein YdhP	--force_02753	Hexuronate transporter	--force_06104	Inner membrane transport protein YdhP	--force_03753	Hexuronate transporter	--force_01479	Hexuronate transporter	--force_04077	Hexuronate transporter	--force_00426	Hexuronate transporter	--force_00446	Hexuronate transporter	--force_06087	Hexuronate transporter	--force_04496	Hexuronate transporter	--force_05865	Hexuronate transporter	--force_01317	Hexuronate transporter	--force_01428	Hexuronate transporter	--force_02684	Hexuronate transporter	--force_03644	Hexuronate transporter	--force_04920	Hexuronate transporter	--force_04242	Hexuronate transporter	--force_04533	Hexuronate transporter	--force_04350	Hexuronate transporter
--force_05075	Inner membrane transport protein YdhP	--force_03691	Glycerol-3-phosphate transporter	--force_02932	Glycerol-3-phosphate transporter	--force_04377	Inner membrane transport protein YdhP	--force_03980	Hexuronate transporter	--force_02960	Inner membrane transport protein YdhP	--force_05729	Inner membrane transport protein YdhP	--force_05656	Inner membrane transport protein YdhP	--force_05512	Inner membrane transport protein YdhP	--force_04105	Inner membrane transport protein YdhP	--force_01760	Inner membrane transport protein YdhP	--force_02684	Inner membrane transport protein YdhP	--force_01833	Inner membrane transport protein YdhP	--force_05085	Inner membrane transport protein YdhP	--force_04854	Inner membrane transport protein YdhP	--force_03984	Inner membrane transport protein YdhP	--force_04338	Inner membrane transport protein YdhP	--force_03860	Inner membrane transport protein YdhP	--force_04172	Inner membrane transport protein YdhP	--force_03529	Inner membrane transport protein YdhP	--force_03621	Inner membrane transport protein YdhP
--force_05314	Inner membrane transport protein YdhP	--force_00737	Inner membrane transport protein YdhP	--force_00158	Inner membrane transport protein YdhP	--force_05145	Glycerol-3-phosphate transporter	--force_04353	Inner membrane transport protein YdhP	--force_04116	Inner membrane transport protein YdhP	--force_04221	Glycerol-3-phosphate transporter	--force_03913	Glycerol-3-phosphate transporter	--force_05729	Inner membrane transport protein YdhP	--force_05723	Inner membrane transport protein YdhP	--force_03187	Glycerol-3-phosphate transporter	--force_05302	Glycerol-3-phosphate transporter	--force_05021	Glycerol-3-phosphate transporter	--force_03304	Inner membrane transport protein YdhP	--force_06048	Inner membrane transport protein YdhP	--force_01443	Inner membrane transport protein YdhP	--force_03998	Glycerol-3-phosphate transporter	--force_02833	Glycerol-3-phosphate transporter	--force_05379	Glycerol-3-phosphate transporter	--force_02297	Glycerol-3-phosphate transporter	--force_02514	Glycerol-3-phosphate transporter
--force_00347	Membrane sensor protein UhpC	--force_05701	Putative tartrate transporter	--force_05768	Putative tartrate transporter	--force_02570	Inner membrane transport protein YdhP	--force_01529	Membrane sensor protein UhpC	--force_04763	Glycerol-3-phosphate transporter	--force_01024	Inner membrane transport protein YdhP	--force_01251	Inner membrane transport protein YdhP	--force_01221	Glycerol-3-phosphate transporter	--force_01220	Glycerol-3-phosphate transporter	--force_03614	Inner membrane transport protein YdhP	--force_00034	Inner membrane transport protein YdhP	--force_04405	Inner membrane transport protein YdhP	--force_02924	Glycerol-3-phosphate transporter	--force_02284	Glycerol-3-phosphate transporter	--force_00932	Glycerol-3-phosphate transporter	--force_01452	Inner membrane transport protein YdhP	--force_01521	Inner membrane transport protein YdhP	--force_05678	Inner membrane transport protein YdhP	--force_02596	Inner membrane transport protein YdhP	--force_00875	Inner membrane transport protein YdhP
--force_04481	Purine ribonucleoside efflux pump NepI	--force_05882	4-hydroxybenzoate transporter PcaK	--force_06014	4-hydroxybenzoate transporter PcaK	--force_04795	Putative tartrate transporter	--force_03367	Inner membrane transport protein YdhP	--force_05740	Putative tartrate transporter	--force_03457	Putative tartrate transporter	--force_01081	Putative tartrate transporter	--force_03997	Purine ribonucleoside efflux pump NepI	--force_05289	Purine ribonucleoside efflux pump NepI	--force_04357	Putative tartrate transporter	--force_02788	Putative tartrate transporter	--force_05287	Putative tartrate transporter	--force_05818	4-hydroxybenzoate transporter PcaK	--force_04250	4-hydroxybenzoate transporter PcaK	--force_04062	Purine ribonucleoside efflux pump NepI	--force_01213	Putative tartrate transporter	--force_05635	Putative tartrate transporter	--force_01474	Putative tartrate transporter	--force_05461	Putative tartrate transporter	--force_05213	Putative tartrate transporter
--force_04442	Putative tartrate transporter	--force_04092	Membrane sensor protein UhpC	--force_04138	Membrane sensor protein UhpC	--force_05347	4-hydroxybenzoate transporter PcaK	--force_03061	Putative tartrate transporter	--force_04810	4-hydroxybenzoate transporter PcaK	--force_03884	Membrane sensor protein UhpC	--force_02482	Membrane sensor protein UhpC	--force_04204	4-hydroxybenzoate transporter PcaK	--force_05082	4-hydroxybenzoate transporter PcaK	--force_03798	4-hydroxybenzoate transporter PcaK	--force_03108	4-hydroxybenzoate transporter PcaK	--force_05909	4-hydroxybenzoate transporter PcaK	--force_04229	Putative tartrate transporter	--force_05869	Putative tartrate transporter	--force_05476	Putative tartrate transporter	--force_00927	4-hydroxybenzoate transporter PcaK	--force_04493	4-hydroxybenzoate transporter PcaK	--force_01799	4-hydroxybenzoate transporter PcaK	--force_04949	Membrane sensor protein UhpC	--force_05110	Membrane sensor protein UhpC
--force_04688	4-hydroxybenzoate transporter PcaK	--force_05515	Multidrug resistance protein Stp	--force_03828	Multidrug resistance protein Stp	--force_04530	Membrane sensor protein UhpC	--force_05043	4-hydroxybenzoate transporter PcaK	--force_02345	Multidrug resistance protein Stp	--force_03105	4-hydroxybenzoate transporter PcaK	--force_00729	4-hydroxybenzoate transporter PcaK	--force_03958	Putative tartrate transporter	--force_05328	Putative tartrate transporter	--force_00608	Membrane sensor protein UhpC	--force_04572	Multidrug resistance protein Stp	--force_03515	Multidrug resistance protein Stp	--force_02681	Multidrug resistance protein Stp	--force_02398	Multidrug resistance protein Stp	--force_04268	4-hydroxybenzoate transporter PcaK	--force_03133	Membrane sensor protein UhpC	--force_00364	Membrane sensor protein UhpC	--force_02826	Multidrug resistance protein Stp	--force_05830	4-hydroxybenzoate transporter PcaK	--force_05857	4-hydroxybenzoate transporter PcaK
--force_00458	Multidrug resistance protein Stp	--force_04663	Putative metabolite transport protein YjhB	--force_05156	Putative metabolite transport protein YjhB	--force_03702	Multidrug resistance protein Stp	--force_04815	Membrane sensor protein UhpC	--force_04618	Membrane sensor protein UhpC	--force_04111	Multidrug resistance protein Stp	--force_04023	Multidrug resistance protein Stp	--force_01334	Multidrug resistance protein Stp	--force_01333	Multidrug resistance protein Stp	--force_00784	Multidrug resistance protein Stp	--force_05082	Membrane sensor protein UhpC	--force_04447	Membrane sensor protein UhpC	--force_05639	Membrane sensor protein UhpC	--force_03303	Membrane sensor protein UhpC	--force_00482	Membrane sensor protein UhpC	--force_04802	Multidrug resistance protein Stp	--force_00196	Multidrug resistance protein Stp	--force_04754	Membrane sensor protein UhpC	--force_02407	Multidrug resistance protein Stp	--force_02404	Multidrug resistance protein Stp
--force_00775	Membrane sensor protein UhpC	--force_02122	Staphyloferrin B transporter	--force_01718	Staphyloferrin B transporter	--force_05949	Putative metabolite transport protein YjhB	--force_06348	Bicyclomycin resistance protein	--force_04375	Putative metabolite transport protein YjhB	--force_03216	Putative metabolite transport protein YjhB	--force_00840	Putative metabolite transport protein YjhB	--force_04315	Membrane sensor protein UhpC	--force_03541	Membrane sensor protein UhpC	--force_03901	Putative metabolite transport protein YjhB	--force_02999	Putative metabolite transport protein YjhB	--force_03949	Putative metabolite transport protein YjhB	--force_04041	Putative metabolite transport protein YjhB	--force_04350	Putative metabolite transport protein YjhB	--force_00814	Multidrug resistance protein Stp	--force_01030	Putative metabolite transport protein YjhB	--force_04390	Putative metabolite transport protein YjhB	--force_01697	Putative metabolite transport protein YjhB	--force_04660	Putative metabolite transport protein YjhB	--force_04632	Putative metabolite transport protein YjhB
--force_04583	Putative metabolite transport protein YjhB	--force_00513	Bicyclomycin resistance protein	--force_00382	Bicyclomycin resistance protein	--force_00366	Staphyloferrin B transporter	--force_02095	Multidrug resistance protein Stp	--force_05470	Bicyclomycin resistance protein	--force_02838	Bicyclomycin resistance protein	--force_02167	Bicyclomycin resistance protein	--force_04102	Putative metabolite transport protein YjhB	--force_05184	Putative metabolite transport protein YjhB	--force_05983	Staphyloferrin B transporter	--force_00666	Staphyloferrin B transporter	--force_01178	Staphyloferrin B transporter	--force_00834	Bicyclomycin resistance protein	--force_05265	Bicyclomycin resistance protein	--force_04160	Putative metabolite transport protein YjhB	--force_00637	Bicyclomycin resistance protein	--force_00978	Bicyclomycin resistance protein	--force_03068	Inner membrane transport protein YdhP	--force_00347	Staphyloferrin B transporter	--force_01433	Staphyloferrin B transporter
--force_01988	Bicyclomycin resistance protein	--force_04648	Purine efflux pump PbuE	--force_05171	Purine efflux pump PbuE	--force_05559	Purine efflux pump PbuE	--force_05154	Putative metabolite transport protein YjhB	--force_02109	Bicyclomycin resistance protein	--force_05214	Bicyclomycin resistance protein	--force_04927	Bicyclomycin resistance protein	--force_02361	Bicyclomycin resistance protein	--force_01744	Bicyclomycin resistance protein	--force_05348	Bicyclomycin resistance protein	--force_03021	Purine efflux pump PbuE	--force_03927	Purine efflux pump PbuE	--force_00192	Bicyclomycin resistance protein	--force_03857	Bicyclomycin resistance protein	--force_01663	Bicyclomycin resistance protein	--force_01015	Purine efflux pump PbuE	--force_04405	Purine efflux pump PbuE	--force_02344	Bicyclomycin resistance protein	--force_02838	Bicyclomycin resistance protein	--force_00633	Bicyclomycin resistance protein
--force_03803	4-hydroxybenzoate transporter PcaK	--force_05360	Bicyclomycin resistance protein	--force_05622	Bicyclomycin resistance protein	--force_01767	Bicyclomycin resistance protein	--force_03664	Staphyloferrin B transporter	--force_05211	sugar efflux transporter	--force_03194	Purine efflux pump PbuE	--force_00818	Purine efflux pump PbuE	--force_01789	Bicyclomycin resistance protein	--force_02316	Bicyclomycin resistance protein	--force_03886	Purine efflux pump PbuE	--force_00995	Bicyclomycin resistance protein	--force_00462	Bicyclomycin resistance protein	--force_02276	4-hydroxybenzoate transporter PcaK	--force_03076	4-hydroxybenzoate transporter PcaK	--force_02236	Putative metabolite transport protein NicT	--force_00018	Putative metabolite transport protein NicT	--force_05324	Putative metabolite transport protein NicT	--force_05301	sugar efflux transporter	--force_04682	Purine efflux pump PbuE	--force_04610	Purine efflux pump PbuE
--force_01403	Bicyclomycin resistance protein	--force_05350	Putative metabolite transport protein NicT	--force_05612	Putative metabolite transport protein NicT	--force_02285	sugar efflux transporter	--force_03502	Bicyclomycin resistance protein	--force_04390	Purine efflux pump PbuE	--force_05204	Putative metabolite transport protein NicT	--force_04937	Putative metabolite transport protein NicT	--force_01799	Putative metabolite transport protein NicT	--force_02306	Putative metabolite transport protein NicT	--force_05437	Putative metabolite transport protein NicT	--force_04846	Bicyclomycin resistance protein	--force_04174	Bicyclomycin resistance protein	--force_00824	Putative metabolite transport protein NicT	--force_03867	Putative metabolite transport protein NicT	--force_02246	Bicyclomycin resistance protein	--force_00008	Bicyclomycin resistance protein	--force_05334	Bicyclomycin resistance protein	--force_03096	Bicyclomycin resistance protein	--force_05249	Bicyclomycin resistance protein	--force_00006	Bicyclomycin resistance protein
--force_01978	Putative metabolite transport protein NicT	--force_01422	4-hydroxybenzoate transporter PcaK	--force_01420	4-hydroxybenzoate transporter PcaK	--force_03839	Putative metabolite transport protein NicT	--force_00714	Bicyclomycin resistance protein	--force_02099	Putative metabolite transport protein NicT	--force_02221	4-hydroxybenzoate transporter PcaK	--force_00222	4-hydroxybenzoate transporter PcaK	--force_02926	4-hydroxybenzoate transporter PcaK	--force_03313	4-hydroxybenzoate transporter PcaK	--force_05427	Bicyclomycin resistance protein	--force_01712	4-hydroxybenzoate transporter PcaK	--force_01523	4-hydroxybenzoate transporter PcaK	--force_04026	Purine efflux pump PbuE	--force_04335	Purine efflux pump PbuE	--force_02945	sugar efflux transporter	--force_02488	4-hydroxybenzoate transporter PcaK	--force_02556	4-hydroxybenzoate transporter PcaK	--force_01713	Purine efflux pump PbuE	--force_05259	Putative metabolite transport protein NicT	--force_00016	Putative metabolite transport protein NicT
--force_04600	Purine efflux pump PbuE	--force_05629	Inner membrane metabolite transport protein Yg	--force_05819	Inner membrane metabolite transport protein Yg	--force_01367	4-hydroxybenzoate transporter PcaK	--force_05132	Purine efflux pump PbuE	--force_01122	4-hydroxybenzoate transporter PcaK	--force_00988	Purine efflux pump PbuE	--force_01287	Purine efflux pump PbuE	--force_04117	Purine efflux pump PbuE	--force_05169	Purine efflux pump PbuE	--force_01066	4-hydroxybenzoate transporter PcaK	--force_04836	Putative metabolite transport protein NicT	--force_04164	Putative metabolite transport protein NicT	--force_04139	Inner membrane transport protein RhmT	--force_06084	Purine efflux pump PbuE	--force_03483	4-hydroxybenzoate transporter PcaK	--force_01488	Purine efflux pump PbuE	--force_01557	Purine efflux pump PbuE	--force_03106	Putative metabolite transport protein NicT	--force_01223	4-hydroxybenzoate transporter PcaK	--force_02152	4-hydroxybenzoate transporter PcaK
--force_02053	Inner membrane metabolite transport protein Yg	--force_00773	Purine efflux pump PbuE	--force_00122	Purine efflux pump PbuE	--force_02606	Purine efflux pump PbuE	--force_05175	Bicyclomycin resistance protein	--force_04080	Purine efflux pump PbuE	--force_06044	Inner membrane metabolite transport protein Yg	--force_05965	Inner membrane metabolite transport protein Yg	--force_05693	Purine efflux pump PbuE	--force_05759	Purine efflux pump PbuE	--force_03650	Purine efflux pump PbuE	--force_00070	Purine efflux pump PbuE	--force_04369	Purine efflux pump PbuE	--force_03340	Purine efflux pump PbuE	--force_06179	Inner membrane metabolite transport protein Yg	--force_04177	Purine efflux pump PbuE	--force_05843	Inner membrane metabolite transport protein Yg	--force_05834	Inner membrane metabolite transport protein Yg	--force_01084	4-hydroxybenzoate transporter PcaK	--force_02560	Purine efflux pump PbuE	--force_00911	Purine efflux pump PbuE
--force_05278	Purine efflux pump PbuE	--force_01158	Fatty acid resistance protein FarB	--force_01156	Fatty acid resistance protein FarB	--force_03829	Bicyclomycin resistance protein	--force_05185	Putative metabolite transport protein NicT	--force_05847	Inner membrane metabolite transport protein Yg	--force_01945	Fatty acid resistance protein FarB	--force_00498	Fatty acid resistance protein FarB	--force_01675	Inner membrane metabolite transport protein Yg	--force_02430	Inner membrane metabolite transport protein Yg	--force_05376	Inner membrane metabolite transport protein Yg	--force_04897	Inner membrane metabolite transport protein Yg	--force_04225	Inner membrane metabolite transport protein Yg	--force_00884	Inner membrane metabolite transport protein Yg	--force_02812	Fatty acid resistance protein FarB	--force_01407	Purine efflux pump PbuE	--force_02216	Fatty acid resistance protein FarB	--force_02284	Fatty acid resistance protein FarB	--force_05714	Purine efflux pump PbuE	--force_05654	Inner membrane metabolite transport protein Yg	--force_05654	Inner membrane metabolite transport protein Yg
--force_02749	sugar efflux transporter	--force_01901	Purine efflux pump PbuE	--force_01939	Purine efflux pump PbuE	--force_03778	Inner membrane metabolite transport protein Yg	--force_00220	4-hydroxybenzoate transporter PcaK	--force_01386	Fatty acid resistance protein FarB	--force_01739	sugar efflux transporter	--force_04337	sugar efflux transporter	--force_02663	Fatty acid resistance protein FarB	--force_04603	Fatty acid resistance protein FarB	--force_02785	Purine efflux pump PbuE	--force_05422	Fatty acid resistance protein FarB	--force_06161	Fatty acid resistance protein FarB	--force_02012	Multidrug export protein EmrB	--force_00706	Purine efflux pump PbuE	--force_05574	Inner membrane metabolite transport protein Yg	--force_05186	sugar efflux transporter	--force_04756	sugar efflux transporter	--force_03039	Inner membrane metabolite transport protein Yg	--force_00490	Purine efflux pump PbuE	--force_01291	Purine efflux pump PbuE
--force_04096	Multidrug export protein EmrB	--force_04079	Tetracycline resistance protein, class C	--force_04151	Tetracycline resistance protein, class C	--force_01075	Fatty acid resistance protein FarB	--force_03331	Purine efflux pump PbuE	--force_00256	Purine efflux pump PbuE	--force_00609	Purine efflux pump PbuE	--force_01666	Purine efflux pump PbuE	--force_03190	Purine efflux pump PbuE	--force_02492	Purine efflux pump PbuE	--force_04433	Fatty acid resistance protein FarB	--force_00454	Purine efflux pump PbuE	--force_00966	Purine efflux pump PbuE	--force_03729	Purine efflux pump PbuE	--force_01160	sugar efflux transporter	--force_03213	Multidrug export protein EmrB	--force_01879	Purine efflux pump PbuE	--force_01948	Purine efflux pump PbuE	--force_01348	Fatty acid resistance protein FarB	--force_00961	Fatty acid resistance protein FarB	--force_01890	Fatty acid resistance protein FarB
--force_01117	Sialic acid transporter NanT	--force_04412	sugar efflux transporter	--force_04846	sugar efflux transporter	--force_00223	Purine efflux pump PbuE	--force_06144	Inner membrane metabolite transport protein Yg	--force_04278	Inner membrane transport protein RhmT	--force_03897	Tetracycline resistance protein, class C	--force_02469	Tetracycline resistance protein, class C	--force_04002	Inner membrane transport protein RhmT	--force_05284	Inner membrane transport protein RhmT	--force_04149	sugar efflux transporter	--force_04117	sugar efflux transporter	--force_03812	sugar efflux transporter	--force_05626	Tetracycline resistance protein, class C	--force_04448	Inner membrane transport protein RhmT	--force_04913	Purine efflux pump PbuE	--force_03119	Tetracycline resistance protein, class C	--force_00378	Tetracycline resistance protein, class C	--force_00558	Purine efflux pump PbuE	--force_04559	Inner membrane transport protein RhmT	--force_04733	Inner membrane transport protein RhmT
--force_03192	Purine efflux pump PbuE	--force_05047	Hexuronate transporter	--force_05387	Hexuronate transporter	--force_04517	Tetracycline resistance protein, class C	--force_01730	Purine efflux pump PbuE	--force_03376	Sialic acid transporter NanT	--force_03509	Purine ribonucleoside efflux pump NepI	--force_01133	Purine ribonucleoside efflux pump NepI	--force_04328	Tetracycline resistance protein, class C	--force_03554	Tetracycline resistance protein, class C	--force_00595	Tetracycline resistance protein, class C	--force_05069	Tetracycline resistance protein, class C	--force_04460	Tetracycline resistance protein, class C	--force_01580	sugar efflux transporter	--force_03316	Tetracycline resistance protein, class C	--force_04067	Inner membrane transport protein RhmT	--force_01265	Purine ribonucleoside efflux pump NepI	--force_04669	Purine ribonucleoside efflux pump NepI	--force_01599	Inner membrane transport protein RhmT	--force_04032	sugar efflux transporter	--force_04140	sugar efflux transporter
--force_04486	Inner membrane transport protein RhmT	--force_05376	Sialic acid transporter NanT	--force_05638	Sialic acid transporter NanT	--force_03250	Sialic acid transporter NanT	--force_00483	Fatty acid resistance protein FarB	--force_05506	Hexuronate transporter	--force_05244	Sialic acid transporter NanT	--force_05308	Sialic acid transporter NanT	--force_04657	Sialic acid transporter NanT	--force_03883	Sialic acid transporter NanT	--force_00330	Sialic acid transporter NanT	--force_05564	Purine ribonucleoside efflux pump NepI	--force_05165	Purine ribonucleoside efflux pump NepI	--force_04553	Sialic acid transporter NanT	--force_03647	Sialic acid transporter NanT	--force_00469	Tetracycline resistance protein, class C	--force_05739	Hexuronate transporter	--force_05575	Hexuronate transporter	--force_04741	Tetracycline resistance protein, class C	--force_04103	Sialic acid transporter NanT	--force_03274	Sialic acid transporter NanT
--force_05756	Hexuronate transporter	--force_06023	Purine ribonucleoside efflux pump NepI	--force_06095	Purine ribonucleoside efflux pump NepI	--force_06135	Purine ribonucleoside efflux pump NepI	--force_03772	sugar efflux transporter	--force_05127	Purine efflux pump PbuE	--force_06233	Hexuronate transporter	--force_06154	Hexuronate transporter	--force_00692	sugar efflux transporter	--force_00181	sugar efflux transporter	--force_04305	Purine ribonucleoside efflux pump NepI	--force_03661	Sialic acid transporter NanT	--force_03018	Sialic acid transporter NanT	--force_05989	Hexuronate transporter	--force_06129	Hexuronate transporter	--force_00135	Sialic acid transporter NanT	--force_05576	Sialic acid transporter NanT	--force_05208	Sialic acid transporter NanT	--force_03550	Sialic acid transporter NanT	--force_05221	Purine ribonucleoside efflux pump NepI	--force_05973	Purine ribonucleoside efflux pump NepI
--force_04392	Purine ribonucleoside efflux pump NepI	--force_01686	Colistin resistance protein EmrB	--force_02154	Colistin resistance protein EmrB	--force_05427	Hexuronate transporter	--force_04802	Tetracycline resistance protein, class C	--force_00042	Colistin resistance protein EmrB	--force_03325	Inner membrane transport protein RhmT	--force_00949	Inner membrane transport protein RhmT	--force_05816	Hexuronate transporter	--force_05799	Hexuronate transporter	--force_05679	Hexuronate transporter	--force_05947	Hexuronate transporter	--force_05675	Hexuronate transporter	--force_03515	Colistin resistance protein EmrB	--force_01433	Putative multidrug resistance protein MdtD	--force_05669	Hexuronate transporter	--force_01138	Inner membrane transport protein RhmT	--force_04282	Inner membrane transport protein RhmT	--force_05762	Hexuronate transporter	--force_05715	Hexuronate transporter	--force_05728	Hexuronate transporter
--force_02976	Colistin resistance protein EmrB	--force_05110	4-hydroxybenzoate transporter PcaK	--force_04674	4-hydroxybenzoate transporter PcaK	--force_04961	Inner membrane transport protein RhmT	--force_04870	Sialic acid transporter NanT	--force_04482	Putative metabolite transport protein YjhB	--force_00825	Colistin resistance protein EmrB	--force_01450	Colistin resistance protein EmrB	--force_03908	Purine efflux pump PbuE	--force_05441	Purine efflux pump PbuE	--force_04010	Inner membrane transport protein RhmT	--force_02891	Inner membrane transport protein RhmT	--force_04057	Inner membrane transport protein RhmT	--force_01312	Putative multidrug resistance protein MdtD	--force_01422	4-hydroxybenzoate transporter PcaK	--force_05789	Purine ribonucleoside efflux pump NepI	--force_01663	Colistin resistance protein EmrB	--force_01732	Colistin resistance protein EmrB	--force_05106	Purine efflux pump PbuE	--force_04962	Tetracycline resistance protein, class C	--force_05097	Tetracycline resistance protein, class C
--force_00789	Tetracycline resistance protein, class B	--force_05099	Putative multidrug resistance protein MdtD	--force_04685	Putative multidrug resistance protein MdtD	--force_00008	Colistin resistance protein EmrB	--force_03113	Purine ribonucleoside efflux pump NepI	--force_03747	4-hydroxybenzoate transporter PcaK	--force_01485	4-hydroxybenzoate transporter PcaK	--force_04083	4-hydroxybenzoate transporter PcaK	--force_04971	Colistin resistance protein EmrB	--force_04935	Colistin resistance protein EmrB	--force_02570	Colistin resistance protein EmrB	--force_00239	Colistin resistance protein EmrB	--force_00750	Colistin resistance protein EmrB	--force_02647	Methyl viologen resistance protein SmvA	--force_03438	Putative metabolite transport protein YjhB	--force_04697	Colistin resistance protein EmrB	--force_05780	Inner membrane transport protein YajR	--force_05751	Inner membrane transport protein YajR	--force_00819	Colistin resistance protein EmrB	--force_00704	Colistin resistance protein EmrB	--force_01076	Colistin resistance protein EmrB
--force_02486	4-hydroxybenzoate transporter PcaK	--force_05982	Inner membrane transport protein YajR	--force_05880	Inner membrane transport protein YajR	--force_06278	Putative metabolite transport protein YjhB	--force_05914	Hexuronate transporter	--force_04605	Tetracycline resistance protein, class B	--force_06149	Inner membrane transport protein YajR	--force_06070	Inner membrane transport protein YajR	--force_04450	Putative metabolite transport protein YjhB	--force_03676	Putative metabolite transport protein YjhB	--force_06081	4-hydroxybenzoate transporter PcaK	--force_04490	4-hydroxybenzoate transporter PcaK	--force_05859	4-hydroxybenzoate transporter PcaK	--force_05914	Inner membrane transport protein YajR	--force_00935	Colistin resistance protein EmrB	--force_02690	4-hydroxybenzoate transporter PcaK	--force_03003	Putative metabolite transport protein YjhB	--force_00494	Putative metabolite transport protein YjhB	--force_04248	4-hydroxybenzoate transporter PcaK	--force_04527	4-hydroxybenzoate transporter PcaK	--force_04356	4-hydroxybenzoate transporter PcaK
--force_05647	Inner membrane transport protein YajR	--force_03957	Putative metabolite transport protein YjhB	--force_04273	Putative metabolite transport protein YjhB	--force_02759	4-hydroxybenzoate transporter PcaK	--force_05636	Inner membrane transport protein RhmT	--force_05941	Inner membrane transport protein YajR	--force_04024	Putative metabolite transport protein YjhB	--force_02342	Putative metabolite transport protein YjhB	--force_00432	4-hydroxybenzoate transporter PcaK	--force_00440	4-hydroxybenzoate transporter PcaK	--force_06171	Inner membrane transport protein YajR	--force_06051	Inner membrane transport protein YajR	--force_05781	Inner membrane transport protein YajR	--force_02527	hypothetical protein	--force_06273	Inner membrane transport protein YajR	--force_00634	Methyl viologen resistance protein SmvA	--force_03650	4-hydroxybenzoate transporter PcaK	--force_04926	4-hydroxybenzoate transporter PcaK	--force_05888	Inner membrane transport protein YajR	--force_05763	Inner membrane transport protein YajR	--force_05781	Inner membrane transport protein YajR
--force_00911	Putative metabolite transport protein YjhB	--force_04242	Methyl viologen resistance protein SmvA	--force_04003	Methyl viologen resistance protein SmvA	--force_03668	Methyl viologen resistance protein SmvA	--force_01946	Colistin resistance protein EmrB	--force_02379	Methyl viologen resistance protein SmvA	--force_03737	Methyl viologen resistance protein SmvA	--force_02629	Methyl viologen resistance protein SmvA	--force_05995	Inner membrane transport protein YajR	--force_05929	Inner membrane transport protein YajR	--force_00750	Methyl viologen resistance protein SmvA	--force_04953	Putative metabolite transport protein YjhB	--force_04576	Putative metabolite transport protein YjhB	--force_05504	Putative metabolite transport protein YjhB	--force_06310	Purine ribonucleoside efflux pump NepI	--force_05717	Inner membrane transport protein YajR	--force_04799	Multidrug export protein EmrB	--force_00199	Multidrug export protein EmrB	--force_04633	Putative metabolite transport protein YjhB	--force_05084	Putative metabolite transport protein YjhB	--force_04975	Putative metabolite transport protein YjhB
--force_00633	Methyl viologen resistance protein SmvA	--force_00601	Putative niacin/nicotinamide transporter NaiP	--force_00294	Putative niacin/nicotinamide transporter NaiP	--force_02748	Putative multidrug resistance protein MdtD	--force_03986	4-hydroxybenzoate transporter PcaK	--force_05229	Alpha-ketoglutarate permease	--force_01757	Alpha-ketoglutarate permease	--force_04355	Alpha-ketoglutarate permease	--force_00710	Alpha-ketoglutarate permease	--force_00163	Alpha-ketoglutarate permease	--force_00467	Putative metabolite transport protein YjhB	--force_04606	Methyl viologen resistance protein SmvA	--force_03549	Methyl viologen resistance protein SmvA	--force_01323	4-hydroxybenzoate transporter PcaK	--force_04526	hypothetical protein	--force_00811	Drug efflux pump JefA	--force_05161	Alpha-ketoglutarate permease	--force_04781	Alpha-ketoglutarate permease	--force_02792	Methyl viologen resistance protein SmvA	--force_03708	Methyl viologen resistance protein SmvA	--force_03942	Methyl viologen resistance protein SmvA
--force_00682	Colistin resistance protein EmrB	--force_04430	Alpha-ketoglutarate permease	--force_04864	Alpha-ketoglutarate permease	--force_05697	Inner membrane transport protein YajR	--force_06305	Inner membrane transport protein YajR	--force_02348	Multidrug export protein EmrB	--force_01491	Alpha-ketoglutarate permease	--force_04089	Alpha-ketoglutarate permease	--force_01509	Methyl viologen resistance protein SmvA	--force_01508	Methyl viologen resistance protein SmvA	--force_04131	Alpha-ketoglutarate permease	--force_04135	Alpha-ketoglutarate permease	--force_03794	Alpha-ketoglutarate permease	--force_01598	Alpha-ketoglutarate permease	--force_02572	Methyl viologen resistance protein SmvA	--force_00346	Putative metabolite transport protein YjhB	--force_04768	Methyl viologen resistance protein SmvA	--force_00230	Methyl viologen resistance protein SmvA	--force_05283	Alpha-ketoglutarate permease	--force_04007	Alpha-ketoglutarate permease	--force_04165	Alpha-ketoglutarate permease
--force_02767	Alpha-ketoglutarate permease	--force_05518	Multidrug export protein EmrB	--force_03831	Multidrug export protein EmrB	--force_02303	Alpha-ketoglutarate permease	--force_04687	Putative metabolite transport protein YjhB	--force_03741	Alpha-ketoglutarate permease	--force_04108	Multidrug export protein EmrB	--force_04026	Multidrug export protein EmrB	--force_01337	Drug efflux pump JefA	--force_01336	Drug efflux pump JefA	--force_00781	Multidrug export protein EmrB	--force_04575	Multidrug export protein EmrB	--force_03518	Multidrug export protein EmrB	--force_01329	Alpha-ketoglutarate permease	--force_01142	Alpha-ketoglutarate permease	--force_02963	Alpha-ketoglutarate permease	--force_05256	Alpha-ketoglutarate permease	--force_04932	Alpha-ketoglutarate permease	--force_04254	Alpha-ketoglutarate permease	--force_02410	Multidrug export protein EmrB	--force_02401	Multidrug export protein EmrB
--force_02492	Alpha-ketoglutarate permease	--force_05116	Alpha-ketoglutarate permease	--force_04668	Alpha-ketoglutarate permease	--force_03699	Multidrug export protein EmrB	--force_02061	Methyl viologen resistance protein SmvA	--force_02427	Colistin resistance protein EmrB	--force_03794	Colistin resistance protein EmrB	--force_02572	Colistin resistance protein EmrB	--force_01568	Colistin resistance protein EmrB	--force_01566	Colistin resistance protein EmrB	--force_05262	Putative niacin/nicotinamide transporter NaiP	--force_04484	Alpha-ketoglutarate permease	--force_05853	Alpha-ketoglutarate permease	--force_02599	Colistin resistance protein EmrB	--force_01416	Alpha-ketoglutarate permease	--force_00578	Colistin resistance protein EmrB	--force_03639	Putative multidrug resistance protein MdtD	--force_04915	Putative multidrug resistance protein MdtD	--force_02823	Drug efflux pump JefA	--force_04521	Alpha-ketoglutarate permease	--force_04362	Alpha-ketoglutarate permease
--force_01314	Putative niacin/nicotinamide transporter NaiP	--force_04287	Colistin resistance protein EmrB	--force_04048	Colistin resistance protein EmrB	--force_02765	Alpha-ketoglutarate permease	--force_03797	Alpha-ketoglutarate permease	--force_04255	Putative niacin/nicotinamide transporter NaiP	--force_01474	Putative multidrug resistance protein MdtD	--force_04072	Putative multidrug resistance protein MdtD	--force_05581	Putative niacin/nicotinamide transporter NaiP	--force_05555	Putative niacin/nicotinamide transporter NaiP	--force_06092	Putative multidrug resistance protein MdtD	--force_00909	Putative niacin/nicotinamide transporter NaiP	--force_00548	Putative niacin/nicotinamide transporter NaiP	--force_00103	Putative niacin/nicotinamide transporter NaiP	--force_05615	Putative niacin/nicotinamide transporter NaiP	--force_02696	Alpha-ketoglutarate permease	--force_00723	Putative niacin/nicotinamide transporter NaiP	--force_00892	Putative niacin/nicotinamide transporter NaiP	--force_02745	Colistin resistance protein EmrB	--force_02732	Putative niacin/nicotinamide transporter NaiP	--force_00739	Putative niacin/nicotinamide transporter NaiP
--force_02475	Putative multidrug resistance protein MdtD	--force_04612	putative MFS-type transporter EfpA	--force_05207	putative MFS-type transporter EfpA	--force_01853	Putative niacin/nicotinamide transporter NaiP	--force_02092	Multidrug export protein EmrB	--force_04426	putative MFS-type transporter EfpA	--force_02924	Putative niacin/nicotinamide transporter NaiP	--force_02253	Putative niacin/nicotinamide transporter NaiP	--force_00438	Alpha-ketoglutarate permease	--force_00434	Alpha-ketoglutarate permease	--force_06075	Alpha-ketoglutarate permease	--force_04501	Putative multidrug resistance protein MdtD	--force_05870	Putative multidrug resistance protein MdtD	--force_02678	Multidrug export protein EmrB	--force_02401	Multidrug export protein EmrB	--force_01577	Putative niacin/nicotinamide transporter NaiP	--force_00977	putative MFS-type transporter EfpA	--force_04443	putative MFS-type transporter EfpA	--force_05145	Putative niacin/nicotinamide transporter NaiP	--force_04538	Putative multidrug resistance protein MdtD	--force_04345	Putative multidrug resistance protein MdtD
--force_00461	Multidrug export protein EmrB	--force_02784	putative transport protein HsrA	--force_03190	putative transport protein HsrA	--force_03620	Colistin resistance protein EmrB	--force_03992	Alpha-ketoglutarate permease	--force_02709	putative transport protein HsrA	--force_03156	putative MFS-type transporter EfpA	--force_00780	putative MFS-type transporter EfpA	--force_00421	Putative multidrug resistance protein MdtD	--force_00451	Putative multidrug resistance protein MdtD	--force_00701	Colistin resistance protein EmrB	--force_03057	putative MFS-type transporter EfpA	--force_03891	putative MFS-type transporter EfpA	--force_05770	putative MFS-type transporter EfpA	--force_04299	putative MFS-type transporter EfpA	--force_02679	Putative multidrug resistance protein MdtD	--force_03422	putative transport protein HsrA	--force_03377	putative transport protein HsrA	--force_04237	Putative multidrug resistance protein MdtD	--force_03756	Colistin resistance protein EmrB	--force_03990	Colistin resistance protein EmrB
--force_04636	putative MFS-type transporter EfpA	--force_00096	hypothetical protein	--force_00797	hypothetical protein	--force_03153	putative transport protein HsrA	--force_00628	Putative niacin/nicotinamide transporter NaiP	--force_00814	hypothetical protein	--force_01257	putative transport protein HsrA	--force_03474	putative transport protein HsrA	--force_04153	putative MFS-type transporter EfpA	--force_05133	putative MFS-type transporter EfpA	--force_02352	putative transport protein HsrA	--force_04650	Colistin resistance protein EmrB	--force_03593	Colistin resistance protein EmrB	--force_01101	putative transport protein HsrA	--force_02620	Colistin resistance protein EmrB	--force_04213	putative MFS-type transporter EfpA	--force_03223	Colistin resistance protein EmrB	--force_00274	Colistin resistance protein EmrB	--force_01749	putative MFS-type transporter EfpA	--force_04720	putative MFS-type transporter EfpA	--force_04572	putative MFS-type transporter EfpA
--force_02265	putative transport protein HsrA	--force_00315	hypothetical protein	--force_00579	hypothetical protein	--force_00927	4-hydroxybenzoate transporter PcaK	--force_03975	Putative multidrug resistance protein MdtD	--force_06015	4-hydroxybenzoate transporter PcaK	--force_05900	4-hydroxybenzoate transporter PcaK	--force_05827	4-hydroxybenzoate transporter PcaK	--force_00212	putative transport protein HsrA	--force_00660	putative transport protein HsrA	--force_03848	putative MFS-type transporter EfpA	--force_02164	putative transport protein HsrA	--force_02320	putative transport protein HsrA	--force_04279	sugar efflux transporter	--force_01642	putative transport protein HsrA	--force_02459	putative transport protein HsrA	--force_05907	4-hydroxybenzoate transporter PcaK	--force_05887	4-hydroxybenzoate transporter PcaK	--force_02062	putative transport protein HsrA	--force_03048	putative transport protein HsrA	--force_03061	putative transport protein HsrA
--force_03765	4-hydroxybenzoate transporter PcaK	--force_06202	4-hydroxybenzoate transporter PcaK	--force_06210	4-hydroxybenzoate transporter PcaK	--force_05503	hypothetical protein	--force_02013	Colistin resistance protein EmrB	--force_01901	hypothetical protein	--force_02477	hypothetical protein	--force_01806	hypothetical protein	--force_02216	hypothetical protein	--force_01889	hypothetical protein	--force_05054	4-hydroxybenzoate transporter PcaK	--force_03468	4-hydroxybenzoate transporter PcaK	--force_02874	4-hydroxybenzoate transporter PcaK	--force_05441	4-hydroxybenzoate transporter PcaK	--force_04334	hypothetical protein	--force_01809	hypothetical protein	--force_00222	hypothetical protein	--force_01393	hypothetical protein	--force_00118	hypothetical protein	--force_01643	hypothetical protein	--force_00426	hypothetical protein
--force_01550	hypothetical protein	--force_04647	L-lactate transporter	--force_05172	L-lactate transporter	--force_01622	hypothetical protein	--force_05094	putative MFS-type transporter EfpA	--force_04391	L-lactate transporter	--force_02090	Inner membrane transport protein YnfM	--force_00353	Inner membrane transport protein YnfM	--force_03815	4-hydroxybenzoate transporter PcaK	--force_03117	4-hydroxybenzoate transporter PcaK	--force_01665	hypothetical protein	--force_01361	hypothetical protein	--force_00096	hypothetical protein	--force_00396	hypothetical protein	--force_04639	hypothetical protein	--force_02032	hypothetical protein	--force_00434	hypothetical protein	--force_01181	hypothetical protein	--force_02490	hypothetical protein	--force_05942	4-hydroxybenzoate transporter PcaK	--force_06004	4-hydroxybenzoate transporter PcaK
--force_04601	L-lactate transporter	--force_02379	hypothetical protein	--force_02377	hypothetical protein	--force_05558	L-lactate transporter	--force_02412	putative transport protein HsrA	--force_01682	hypothetical protein	--force_03426	hypothetical protein	--force_01050	hypothetical protein	--force_01995	hypothetical protein	--force_02110	hypothetical protein	--force_03885	L-lactate transporter	--force_03022	L-lactate transporter	--force_03926	L-lactate transporter	--force_04025	hypothetical protein	--force_04063	hypothetical protein	--force_04178	L-lactate transporter	--force_01014	L-lactate transporter	--force_04406	L-lactate transporter	--force_00010	4-hydroxybenzoate transporter PcaK	--force_01854	hypothetical protein	--force_00214	hypothetical protein
--force_01773	hypothetical protein	--force_02425	L-lactate transporter	--force_02423	L-lactate transporter	--force_00728	hypothetical protein	--force_06384	4-hydroxybenzoate transporter PcaK	--force_01253	Inner membrane transport protein YnfM	--force_03193	L-lactate transporter	--force_00817	L-lactate transporter	--force_04118	hypothetical protein	--force_05168	hypothetical protein	--force_03350	hypothetical protein	--force_01582	Inner membrane transport protein YnfM	--force_01393	Inner membrane transport protein YnfM	--force_00618	hypothetical protein	--force_05412	4-hydroxybenzoate transporter PcaK	--force_05097	4-hydroxybenzoate transporter PcaK	--force_02358	Inner membrane transport protein YnfM	--force_02426	Inner membrane transport protein YnfM	--force_03303	hypothetical protein	--force_01093	Inner membrane transport protein YnfM	--force_02022	Inner membrane transport protein YnfM
--force_03615	L-lactate transporter	--force_01291	Inner membrane transport protein YnfM	--force_01289	Inner membrane transport protein YnfM	--force_05523	putative MFS-type transporter EfpA	--force_01082	hypothetical protein	--force_00754	L-lactate transporter	--force_00029	L-lactate transporter	--force_03245	L-lactate transporter	--force_02796	Inner membrane transport protein YnfM	--force_03183	Inner membrane transport protein YnfM	--force_01069	Gentisate transporter	--force_03273	L-lactate transporter	--force_02679	L-lactate transporter	--force_02146	Inner membrane transport protein YnfM	--force_00109	L-lactate transporter	--force_03345	Inner membrane transport protein YnfM	--force_04521	L-lactate transporter	--force_04141	L-lactate transporter	--force_01714	L-lactate transporter	--force_00104	L-lactate transporter	--force_01676	L-lactate transporter
--force_03962	Inner membrane transport protein YnfM	--force_06106	putative MFS-type transporter YfcJ	--force_06149	putative MFS-type transporter YfcJ	--force_01235	Inner membrane transport protein YnfM	--force_05131	L-lactate transporter	--force_04909	putative MFS-type transporter YfcJ	--force_02693	hypothetical protein	--force_02022	hypothetical protein	--force_03572	L-lactate transporter	--force_02991	L-lactate transporter	--force_00936	Inner membrane transport protein YnfM	--force_01715	Sialic acid transporter NanT	--force_01526	Sialic acid transporter NanT	--force_05250	L-lactate transporter	--force_02946	Inner membrane transport protein YnfM	--force_04548	L-lactate transporter	--force_02491	Gentisate transporter	--force_02559	Gentisate transporter	--force_00179	L-lactate transporter	--force_04683	L-lactate transporter	--force_04609	L-lactate transporter
--force_05087	Proline/betaine transporter	--force_01425	Gentisate transporter	--force_01423	Gentisate transporter	--force_00681	L-lactate transporter	--force_02779	L-lactate transporter	--force_02948	Proline/betaine transporter	--force_00295	L-lactate transporter	--force_02979	L-lactate transporter	--force_03693	L-lactate transporter	--force_02722	L-lactate transporter	--force_06395	putative MFS-type transporter YfcJ	--force_01140	hypothetical protein	--force_00317	hypothetical protein	--force_05691	putative MFS-type transporter YfcJ	--force_04152	putative MFS-type transporter YfcJ	--force_01862	Inner membrane protein YbjJ	--force_04350	Proline/betaine transporter	--force_03872	Proline/betaine transporter	--force_01214	Inner membrane transport protein YnfM	--force_01226	Gentisate transporter	--force_02155	Gentisate transporter
--force_04790	putative MFS-type transporter YfcJ	--force_03308	Proline/betaine transporter	--force_03714	Proline/betaine transporter	--force_06094	putative MFS-type transporter YfcJ	--force_00350	Inner membrane transport protein YnfM	--force_01735	Inner membrane protein YbjJ	--force_02224	Gentisate transporter	--force_00219	Gentisate transporter	--force_04304	putative MFS-type transporter YfcJ	--force_04982	putative MFS-type transporter YfcJ	--force_01426	hypothetical protein	--force_02696	Proline/betaine transporter	--force_01821	Proline/betaine transporter	--force_05097	Proline/betaine transporter	--force_04842	Proline/betaine transporter	--force_03996	Proline/betaine transporter	--force_00829	putative MFS-type transporter YfcJ	--force_05519	putative MFS-type transporter YfcJ	--force_01081	Gentisate transporter	--force_05608	putative MFS-type transporter YfcJ	--force_05552	putative MFS-type transporter YfcJ
--force_03800	Gentisate transporter	--force_00260	Inner membrane protein YbjJ	--force_00634	Inner membrane protein YbjJ	--force_04389	Proline/betaine transporter	--force_03525	Enterobactin exporter EntS	--force_01119	Gentisate transporter	--force_02639	Inner membrane protein YbjJ	--force_01968	Inner membrane protein YbjJ	--force_03597	hypothetical protein	--force_02626	hypothetical protein	--force_01748	Proline/betaine transporter	--force_06142	putative MFS-type transporter YfcJ	--force_06064	putative MFS-type transporter YfcJ	--force_02279	Gentisate transporter	--force_03079	Gentisate transporter	--force_04363	putative MFS-type transporter YfcJ	--force_05598	hypothetical protein	--force_05429	hypothetical protein	--force_05852	putative MFS-type transporter YfcJ	--force_03541	Proline/betaine transporter	--force_03609	Proline/betaine transporter
--force_02040	Colistin resistance protein EmrB	--force_00982	hypothetical protein	--force_00980	hypothetical protein	--force_01370	Gentisate transporter	--force_00861	hypothetical protein	--force_06046	hypothetical protein	--force_06330	putative MFS-type transporter YfcJ	--force_06307	putative MFS-type transporter YfcJ	--force_05524	Proline/betaine transporter	--force_04093	Proline/betaine transporter	--force_03396	L-lactate transporter	--force_05760	hypothetical protein	--force_05539	hypothetical protein	--force_02292	putative MFS-type transporter YcaD	--force_05567	hypothetical protein	--force_03486	Gentisate transporter	--force_02504	putative MFS-type transporter YcaD	--force_02572	putative MFS-type transporter YcaD	--force_02543	Inner membrane protein YbjJ	--force_00835	hypothetical protein	--force_05371	hypothetical protein
--force_04223	hypothetical protein	--force_01438	putative MFS-type transporter YcaD	--force_01436	putative MFS-type transporter YcaD	--force_01383	putative MFS-type transporter YcaD	--force_00217	Gentisate transporter	--force_01106	putative MFS-type transporter YcaD	--force_05741	Proline/betaine transporter	--force_05668	Proline/betaine transporter	--force_02929	Gentisate transporter	--force_03316	Gentisate transporter	--force_04764	hypothetical protein	--force_01729	putative MFS-type transporter YcaD	--force_01540	putative MFS-type transporter YcaD	--force_00427	Inner membrane metabolite transport protein Yh	--force_03092	putative MFS-type transporter YcaD	--force_05587	Colistin resistance protein EmrB	--force_04772	L-lactate transporter	--force_00226	L-lactate transporter	--force_04184	Proline/betaine transporter	--force_01239	putative MFS-type transporter YcaD	--force_02168	putative MFS-type transporter YcaD
--force_01581	Inner membrane metabolite transport protein Yh	--force_00283	Inner membrane metabolite transport protein Yh	--force_00611	Inner membrane metabolite transport protein Yh	--force_01013	Inner membrane transport protein YnfM	--force_05718	putative MFS-type transporter YfcJ	--force_01713	Inner membrane metabolite transport protein Yh	--force_06403	hypothetical protein	--force_06393	hypothetical protein	--force_02942	putative MFS-type transporter YcaD	--force_03329	putative MFS-type transporter YcaD	--force_01082	putative MFS-type transporter YcaD	--force_04602	L-lactate transporter	--force_03545	L-lactate transporter	--force_01884	hypothetical protein	--force_04608	Inner membrane metabolite transport protein Yh	--force_03499	putative MFS-type transporter YcaD	--force_00403	Inner membrane metabolite transport protein Yh	--force_01212	Inner membrane metabolite transport protein Yh	--force_01068	putative MFS-type transporter YcaD	--force_01675	Inner membrane metabolite transport protein Yh	--force_00394	Inner membrane metabolite transport protein Yh
--force_03787	putative MFS-type transporter YcaD	--force_03039	hypothetical protein	--force_03445	hypothetical protein	--force_00948	hypothetical protein	--force_04365	Proline/betaine transporter	--force_01492	Inner membrane transport protein YnfM	--force_02237	putative MFS-type transporter YcaD	--force_00206	putative MFS-type transporter YcaD	--force_02184	Inner membrane metabolite transport protein Yh	--force_01921	Inner membrane metabolite transport protein Yh	--force_01458	Inner membrane metabolite transport protein Yh	--force_01171	Inner membrane metabolite transport protein Yh	--force_00286	Inner membrane metabolite transport protein Yh	--force_03285	putative MFS-type transporter YcaD	--force_06029	putative MFS-type transporter YcaD	--force_01840	Inner membrane metabolite transport protein Yh	--force_02155	Inner membrane transport protein YnfM	--force_02223	Inner membrane transport protein YnfM	--force_02521	Inner membrane metabolite transport protein Yh	--force_03704	L-lactate transporter	--force_03938	L-lactate transporter
--force_00629	L-lactate transporter	--force_04238	L-lactate transporter	--force_03999	L-lactate transporter	--force_01590	Inner membrane metabolite transport protein Yh	--force_03508	hypothetical protein	--force_02375	L-lactate transporter	--force_02662	Inner membrane metabolite transport protein Yh	--force_01991	Inner membrane metabolite transport protein Yh	--force_02536	hypothetical protein	--force_04475	hypothetical protein	--force_04537	Inner membrane transport protein YnfM	--force_05493	Inner membrane transport protein YnfM	--force_05365	Inner membrane transport protein YnfM	--force_02651	L-lactate transporter	--force_02568	L-lactate transporter	--force_03085	hypothetical protein	--force_01433	putative MFS-type transporter YcaD	--force_01502	putative MFS-type transporter YcaD	--force_05630	hypothetical protein	--force_00900	Inner membrane transport protein YnfM	--force_01829	Inner membrane transport protein YnfM
--force_04158	Inner membrane transport protein YnfM	--force_01047	Inner membrane transport protein YnfM	--force_01045	Inner membrane transport protein YnfM	--force_03672	L-lactate transporter	--force_00204	putative MFS-type transporter YcaD	--force_04135	putative MFS-type transporter YcaD	--force_03733	L-lactate transporter	--force_02633	L-lactate transporter	--force_01505	L-lactate transporter	--force_01504	L-lactate transporter	--force_03595	putative MFS-type transporter YcaD	--force_00015	putative MFS-type transporter YcaD	--force_04424	putative MFS-type transporter YcaD	--force_01651	Proline/betaine transporter	--force_00011	putative transporter YycB	--force_03151	Inner membrane transport protein YnfM	--force_05107	Proline/betaine transporter	--force_04835	Proline/betaine transporter	--force_01410	Inner membrane transport protein YnfM	--force_02615	putative MFS-type transporter YcaD	--force_00856	putative MFS-type transporter YcaD
--force_05333	putative MFS-type transporter YcaD	--force_00718	putative MFS-type transporter YcaD	--force_00177	putative MFS-type transporter YcaD	--force_02551	putative MFS-type transporter YcaD	--force_02065	L-lactate transporter	--force_04931	Proline/betaine transporter	--force_01842	Inner membrane transport protein YnfM	--force_00601	Inner membrane transport protein YnfM	--force_02602	Inner membrane transport protein YnfM	--force_04542	Inner membrane transport protein YnfM	--force_00754	L-lactate transporter	--force_04189	Proline/betaine transporter	--force_03740	Proline/betaine transporter	--force_01950	Inner membrane transport protein YnfM	--force_01089	Proline/betaine transporter	--force_01462	putative MFS-type transporter YcaD	--force_00378	hypothetical protein	--force_01237	hypothetical protein	--force_05659	putative MFS-type transporter YcaD	--force_03953	Proline/betaine transporter	--force_04219	Proline/betaine transporter
--force_02821	Proline/betaine transporter	--force_04484	Proline/betaine transporter	--force_04918	Proline/betaine transporter	--force_02358	Proline/betaine transporter	--force_00893	Inner membrane metabolite transport protein Yh	--force_00891	putative transporter YycB	--force_01043	putative MFS-type transporter YcaD	--force_01232	putative MFS-type transporter YcaD	--force_05748	putative MFS-type transporter YcaD	--force_05704	putative MFS-type transporter YcaD	--force_04078	Proline/betaine transporter	--force_03440	putative transporter YycB	--force_02846	putative transporter YycB	--force_05413	putative transporter YycB	--force_02745	Inner membrane transport protein YnfM	--force_00638	L-lactate transporter	--force_04424	putative transporter YycB	--force_04238	putative transporter YycB	--force_02796	L-lactate transporter	--force_00010	putative transporter YycB	--force_01770	putative transporter YycB
--force_01606	hypothetical protein	--force_02208	putative transporter YycB	--force_02206	putative transporter YycB	--force_00899	putative transporter YycB	--force_06429	hypothetical protein	--force_04823	putative MFS-type transporter YhhS	--force_05561	Proline/betaine transporter	--force_05492	Proline/betaine transporter	--force_00763	Proline/betaine transporter	--force_00110	Proline/betaine transporter	--force_04969	putative transporter YycB	--force_01196	hypothetical protein	--force_00261	hypothetical protein	--force_00452	hypothetical protein	--force_04584	hypothetical protein	--force_05337	Proline/betaine transporter	--force_03705	Riboflavin transporter RfnT	--force_03126	Riboflavin transporter RfnT	--force_04870	Proline/betaine transporter	--force_01699	hypothetical protein	--force_00369	hypothetical protein
--force_03737	putative transporter YycB	--force_00253	hypothetical protein	--force_00641	hypothetical protein	--force_05334	putative MFS-type transporter YhhS	--force_00545	Inner membrane transport protein YnfM	--force_01741	hypothetical protein	--force_05872	putative transporter YycB	--force_05799	putative transporter YycB	--force_03787	putative transporter YycB	--force_03089	putative transporter YycB	--force_01502	hypothetical protein	--force_03121	putative MFS-type transporter YhhS	--force_05896	putative MFS-type transporter YhhS	--force_05831	putative MFS-type transporter YhhS	--force_01454	putative transporter YycB	--force_04645	putative transporter YycB	--force_00914	putative MFS-type transporter YhhS	--force_04506	putative MFS-type transporter YhhS	--force_00038	putative transporter YycB	--force_02005	Riboflavin transporter RfnT	--force_02806	Riboflavin transporter RfnT
--force_04701	putative MFS-type transporter YhhS	--force_05895	putative MFS-type transporter YhhS	--force_06027	putative MFS-type transporter YhhS	--force_01560	hypothetical protein	--force_03386	putative MFS-type transporter YcaD	--force_02899	putative transporter YycB	--force_02632	hypothetical protein	--force_01961	hypothetical protein	--force_02160	hypothetical protein	--force_01945	hypothetical protein	--force_03785	putative MFS-type transporter YhhS	--force_05044	Inner membrane transport protein YdhC	--force_04485	Inner membrane transport protein YdhC	--force_01291	putative transporter YycB	--force_04237	putative MFS-type transporter YhhS	--force_01869	hypothetical protein	--force_03612	putative transporter YycB	--force_03567	putative transporter YycB	--force_01873	putative transporter YycB	--force_05817	putative MFS-type transporter YhhS	--force_05870	putative MFS-type transporter YhhS
--force_04252	putative MFS-type transporter YcaD	--force_02975	putative transporter YycB	--force_03381	putative transporter YycB	--force_02963	putative transporter YycB	--force_03850	Proline/betaine transporter	--force_01559	Fosfomycin resistance protein AbaF	--force_03092	putative MFS-type transporter YhhS	--force_00716	putative MFS-type transporter YhhS	--force_04217	putative MFS-type transporter YhhS	--force_05069	putative MFS-type transporter YhhS	--force_00570	Inner membrane transport protein YdhC	--force_02354	putative transporter YycB	--force_06076	putative transporter YycB	--force_00214	Fosfomycin resistance protein AbaF	--force_01913	Riboflavin transporter RfnT	--force_03056	putative MFS-type transporter YcaD	--force_03094	Inner membrane transport protein YdhC	--force_00403	Inner membrane transport protein YdhC	--force_02578	hypothetical protein	--force_03238	putative transporter YycB	--force_02871	putative transporter YycB
--force_00055	Riboflavin transporter RfnT	--force_03399	Riboflavin transporter RfnT	--force_02640	Riboflavin transporter RfnT	--force_01567	hypothetical protein	--force_03489	hypothetical protein	--force_05644	putative MFS-type transporter YcaD	--force_03922	Inner membrane transport protein YdhC	--force_02444	Inner membrane transport protein YdhC	--force_00400	putative transporter YycB	--force_00472	putative transporter YycB	--force_05119	Riboflavin transporter RfnT	--force_06179	hypothetical protein	--force_06180	hypothetical protein	--force_01818	putative MFS-type transporter YcaD	--force_04762	Fosfomycin resistance protein AbaF	--force_04281	putative MFS-type transporter YhhS	--force_00613	Fosfomycin resistance protein AbaF	--force_01002	Fosfomycin resistance protein AbaF	--force_01812	putative MFS-type transporter YhhS	--force_04987	Inner membrane transport protein YdhC	--force_05072	Inner membrane transport protein YdhC
--force_01427	Fosfomycin resistance protein AbaF	--force_04054	Inner membrane transport protein YdhC	--force_04176	Inner membrane transport protein YdhC	--force_01745	Fosfomycin resistance protein AbaF	--force_03516	putative MFS-type transporter YhhS	--force_03868	Riboflavin transporter RfnT	--force_05450	Riboflavin transporter RfnT	--force_05381	Riboflavin transporter RfnT	--force_02339	Fosfomycin resistance protein AbaF	--force_01766	Fosfomycin resistance protein AbaF	--force_01303	Fosfomycin resistance protein AbaF	--force_04000	Riboflavin transporter RfnT	--force_03256	Riboflavin transporter RfnT	--force_03216	Riboflavin transporter RfnT	--force_05538	putative MFS-type transporter YcaD	--force_02650	putative transporter YycB	--force_05627	putative MFS-type transporter YcaD	--force_05400	putative MFS-type transporter YcaD	--force_02367	Fosfomycin resistance protein AbaF	--force_01462	Fosfomycin resistance protein AbaF	--force_00607	Fosfomycin resistance protein AbaF
--force_02454	putative transporter YycB	--force_00491	Fosfomycin resistance protein AbaF	--force_00404	Fosfomycin resistance protein AbaF	--force_02181	Riboflavin transporter RfnT	--force_00918	hypothetical protein	--force_04580	Inner membrane transport protein YdhC	--force_02816	Fosfomycin resistance protein AbaF	--force_02145	Fosfomycin resistance protein AbaF	--force_02507	putative MFS-type transporter YcaD	--force_04446	putative MFS-type transporter YcaD	--force_04842	putative MFS-type transporter YcaD	--force_01017	Fosfomycin resistance protein AbaF	--force_00440	Fosfomycin resistance protein AbaF	--force_05601	Inner membrane transport protein YdhC	--force_03341	Inner membrane transport protein YdhC	--force_01686	Fosfomycin resistance protein AbaF	--force_00443	Sialic acid transporter NanT	--force_01172	Sialic acid transporter NanT	--force_03762	Riboflavin transporter RfnT	--force_00806	putative MFS-type transporter YcaD	--force_05342	putative MFS-type transporter YcaD
--force_00814	Inner membrane transport protein YdhC	--force_00953	putative MFS-type transporter YcaD	--force_00951	putative MFS-type transporter YcaD	--force_04492	Inner membrane transport protein YdhC	--force_05297	putative transporter YycB	--force_02454	Na(+), Li(+), K(+)/H(+) antiporter	--force_05969	putative MFS-type transporter YcaD	--force_05884	putative MFS-type transporter YcaD	--force_04353	Inner membrane transport protein YdhC	--force_03579	Inner membrane transport protein YdhC	--force_02164	putative transporter YycB	--force_05789	putative MFS-type transporter YcaD	--force_05568	putative MFS-type transporter YcaD	--force_01862	hypothetical protein	--force_05211	Putative multidrug resistance protein MdtD	--force_00444	Inner membrane transport protein YdhC	--force_04747	Drug efflux pump JefA	--force_00251	Drug efflux pump JefA	--force_05601	putative MFS-type transporter YcaD	--force_01634	Sialic acid transporter NanT	--force_00435	Sialic acid transporter NanT
--force_01541	Sialic acid transporter NanT	--force_00324	Sialic acid transporter NanT	--force_00570	Sialic acid transporter NanT	--force_04707	putative MFS-type transporter YcaD	--force_05996	hypothetical protein	--force_03276	Proline/betaine transporter	--force_01446	putative transporter YycB	--force_03663	putative transporter YycB	--force_00928	Riboflavin transporter RfnT	--force_00927	Riboflavin transporter RfnT	--force_02228	hypothetical protein	--force_01131	Sialic acid transporter NanT	--force_00326	Sialic acid transporter NanT	--force_01226	hypothetical protein	--force_02593	Drug efflux pump JefA	--force_01225	Riboflavin transporter RfnT	--force_03780	Nitrate transporter	--force_03051	Nitrate transporter	--force_01937	hypothetical protein	--force_02079	Nitrate transporter	--force_02732	Nitrate transporter
--force_00654	Drug efflux pump JefA	--force_04264	Drug efflux pump JefA	--force_04025	Drug efflux pump JefA	--force_01631	Sialic acid transporter NanT	--force_05030	putative MFS-type transporter YhhS	--force_01673	Sialic acid transporter NanT	--force_01382	hypothetical protein	--force_03599	hypothetical protein	--force_04774	Proline/betaine transporter	--force_05998	Proline/betaine transporter	--force_06013	Proline/betaine transporter	--force_04627	Drug efflux pump JefA	--force_03570	Drug efflux pump JefA	--force_00387	Sialic acid transporter NanT	--force_02647	Na(+), Li(+), K(+)/H(+) antiporter	--force_00036	Proline/betaine transporter	--force_03199	Na(+), Li(+), K(+)/H(+) antiporter	--force_00298	Na(+), Li(+), K(+)/H(+) antiporter	--force_03672	Proline/betaine transporter	--force_03780	Na(+), Li(+), K(+)/H(+) antiporter	--force_04014	Na(+), Li(+), K(+)/H(+) antiporter
--force_00709	Na(+), Li(+), K(+)/H(+) antiporter	--force_03473	Nitrate transporter	--force_02714	Nitrate transporter	--force_03028	hypothetical protein	--force_01237	Riboflavin transporter RfnT	--force_02400	Drug efflux pump JefA	--force_02702	Sialic acid transporter NanT	--force_02031	Sialic acid transporter NanT	--force_02225	Sialic acid transporter NanT	--force_01880	Sialic acid transporter NanT	--force_01417	Sialic acid transporter NanT	--force_04674	Na(+), Li(+), K(+)/H(+) antiporter	--force_03617	Na(+), Li(+), K(+)/H(+) antiporter	--force_04453	Alpha-ketoglutarate permease	--force_02066	Nitrate transporter	--force_01800	Sialic acid transporter NanT	--force_03940	putative transporter YycB	--force_02891	putative transporter YycB	--force_02481	Sialic acid transporter NanT	--force_03729	Drug efflux pump JefA	--force_03963	Drug efflux pump JefA
--force_00289	putative transporter YycB	--force_04311	Na(+), Li(+), K(+)/H(+) antiporter	--force_04072	Na(+), Li(+), K(+)/H(+) antiporter	--force_02017	Nitrate transporter	--force_04777	Inner membrane transport protein YdhC	--force_04660	putative transporter YycB	--force_04442	Nitrate transporter	--force_03692	Nitrate transporter	--force_01530	Drug efflux pump JefA	--force_01529	Drug efflux pump JefA	--force_02969	Nitrate transporter	--force_03925	Nitrate transporter	--force_03331	Nitrate transporter	--force_02626	Drug efflux pump JefA	--force_04648	Sialic acid transporter NanT	--force_00551	Na(+), Li(+), K(+)/H(+) antiporter	--force_00679	Inner membrane protein YbjJ	--force_00936	Inner membrane protein YbjJ	--force_04725	Inner membrane transport protein YdhC	--force_02239	putative transporter YycB	--force_02572	putative transporter YycB
--force_00129	Nitrate transporter	--force_03633	putative transporter YycB	--force_02874	putative transporter YycB	--force_03647	Drug efflux pump JefA	--force_00738	Fosfomycin resistance protein AbaF	--force_03942	Nitrate transporter	--force_03818	Na(+), Li(+), K(+)/H(+) antiporter	--force_02548	Na(+), Li(+), K(+)/H(+) antiporter	--force_01595	Na(+), Li(+), K(+)/H(+) antiporter	--force_01593	Na(+), Li(+), K(+)/H(+) antiporter	--force_00677	Na(+), Li(+), K(+)/H(+) antiporter	--force_05360	putative transporter YycB	--force_04963	putative transporter YycB	--force_03142	Nitrate transporter	--force_02226	putative transporter YycB	--force_00613	Drug efflux pump JefA	--force_02771	Drug efflux pump JefA	--force_02794	Inner membrane protein YbjJ	--force_00677	Inner membrane protein YbjJ
--force_03290	Fatty acid resistance protein FarB	--force_00557	Inner membrane protein YbjJ	--force_00338	Inner membrane protein YbjJ	--force_03596	Na(+), Li(+), K(+)/H(+) antiporter	--force_03519	L-lactate transporter	--force_05428	Inner membrane protein YbjJ	--force_03758	Drug efflux pump JefA	--force_02608	Drug efflux pump JefA	--force_01163	putative transporter YycB	--force_01162	putative transporter YycB	--force_00729	Drug efflux pump JefA	--force_00953	Inner membrane protein YbjJ	--force_00504	Inner membrane protein YbjJ	--force_02572	Na(+), Li(+), K(+)/H(+) antiporter	--force_05364	Inner membrane protein YbjJ	--force_00990	putative transporter YycB	--force_02718	Na(+), Li(+), K(+)/H(+) antiporter
--force_05087	putative transporter YycB	--force_02601	putative transporter YycB	--force_04280	putative transporter YycB	--force_03854	putative transporter YycB	--force_01003	Nitrate transporter	--force_01002	Nitrate transporter	--force_03129	putative transporter YycB	--force_02982	putative transporter YycB	--force_00607	Fatty acid resistance protein FarB	--force_01150	Nitrate transporter	--force_05437	putative transporter YycB
--force_01809	Inner membrane protein YbjJ	--force_05779	putative MFS-type transporter YcaD	--force_03606	Riboflavin transporter RfnT	--force_02635	Riboflavin transporter RfnT	--force_00150	Inner membrane protein YbjJ	--force_01621	Inner membrane protein YbjJ	--force_03837	Nitrate transporter
--force_04986	Proline/betaine transporter	--force_02403	Inner membrane protein YbjJ	--force_01702	Inner membrane protein YbjJ	--force_02302	Inner membrane protein YbjJ
--force_00852	Sialic acid transporter NanT	--force_00459	Fatty acid resistance protein FarB
--force_02040	Drug efflux pump JefA
--force_01989	Na(+), Li(+), K(+)/H(+) antiporter
--force_06343	hypothetical protein
--force_01311	Nitrate transporter
--force_01471	putative transporter YycB
--force_00672	Inner membrane protein YbjJ
