# Supplementary material
Source: MDPI journal article supplement (https://www.mdpi.com/2674-1334/1/4/20)
Supplement: s1 [file s1 › Supplementary_material_2.xlsx]

## Sheet: Statistics in our genomes
Genome Id	Number of total sequences	Number of sequences positive to HMM	Percentage of sequences positive to HMM relative to entire genome		Mean of percentage	Mean of sequences positive to HMM	Mean of sequences in the genomes
0101	5754	73	0.0126868		0.0121302	74.381	6136.9
0201	6184	73	0.0118047
0302	6182	73	0.0118085
0401	6277	75	0.0119484
0501	6540	83	0.0126911
0902	6117	73	0.011934
1001	6503	75	0.0115331
1102	6498	75	0.011542
1201	6048	77	0.0127315
1202	6045	77	0.0127378
1402	6526	74	0.0113393
1501	6146	73	0.0118776
1602	6145	73	0.0118796
1703	6064	76	0.012533
1801	6254	74	0.0118324
1901	5737	75	0.013073
2001	5886	71	0.0120625
2102	5875	71	0.0120851
2201	6184	77	0.0124515
2301	5907	72	0.0121889
2402	6003	72	0.011994

## Sheet: Statistics in NCBI genomes
NCBI Id	Number of total sequences	Number of sequences positive to HMM	Percentage of sequences positive to HMM relative to entire genome		Mean of percentage	Mean of sequences positive to HMM	Mean of sequences in the genomes
NZ_AAQW01000001.1	5948	74	0.0124412		0.0122588	75.1178	6138.58
NZ_AFXJ01000001.1	6231	77	0.0123576
NZ_AFXK01000001.1	6207	77	0.0124053
NZ_AP014622.1	6348	77	0.0121298
NZ_AP014646.1	6400	77	0.0120313
NZ_AP014651.1	6696	80	0.0119474
NZ_AP014839.1	6099	74	0.0121331
NZ_AP017302.1	6331	74	0.0116885
NZ_AP024513.1	5814	75	0.0128999
NZ_CM001020.1	6477	80	0.0123514
NZ_CP006980.1	6021	74	0.0122903
NZ_CP006981.1	5927	74	0.0124852
NZ_CP006982.1	6088	74	0.0121551
NZ_CP006983.1	6012	74	0.0123087
NZ_CP006984.1	5998	73	0.0121707
NZ_CP006985.1	6007	74	0.012319
NZ_CP007147.1	5871	77	0.0131153
NZ_CP007224.1	5883	73	0.0124086
NZ_CP007399.1	6052	73	0.0120621
NZ_CP008739.1	6296	76	0.0120712
NZ_CP008749.1	5610	71	0.012656
NZ_CP008856.2	5908	73	0.0123561
NZ_CP008857.1	6762	76	0.0112393
NZ_CP008858.2	6149	75	0.0121971
NZ_CP008859.2	5763	74	0.0128405
NZ_CP008860.2	5985	73	0.0121972
NZ_CP008861.1	6321	76	0.0120234
NZ_CP008862.2	5933	69	0.0116299
NZ_CP008863.1	6402	77	0.0120275
NZ_CP008864.2	6336	77	0.0121528
NZ_CP008865.2	6406	74	0.0115517
NZ_CP008866.2	6227	76	0.0122049
NZ_CP008867.1	5721	73	0.01276
NZ_CP008868.1	5922	75	0.0126646
NZ_CP008869.2	6287	75	0.0119294
NZ_CP008870.2	6233	76	0.0121932
NZ_CP008871.2	6269	74	0.0118041
NZ_CP008872.2	5753	75	0.0130367
NZ_CP008873.1	6235	76	0.0121893
NZ_CP010555.1	6159	74	0.0120149
NZ_CP011317.1	7100	77	0.0108451
NZ_CP011369.1	6722	77	0.0114549
NZ_CP011857.1	6329	73	0.0115342
NZ_CP012001.1	5777	74	0.0128094
NZ_CP012066.1	5794	75	0.0129444
NZ_CP012578.1	6073	73	0.0120204
NZ_CP012579.1	6110	75	0.012275
NZ_CP012580.1	6078	73	0.0120105
NZ_CP012581.1	6110	75	0.012275
NZ_CP012582.1	6070	73	0.0120264
NZ_CP012583.1	6110	75	0.012275
NZ_CP012584.1	6112	74	0.0121073
NZ_CP012585.1	6074	73	0.0120184
NZ_CP012679.1	5981	76	0.0127069
NZ_CP012901.1	6463	75	0.0116045
NZ_CP013113.1	5930	76	0.0128162
NZ_CP013245.1	5814	75	0.0128999
NZ_CP013477.1	5651	73	0.0129181
NZ_CP013478.1	5651	73	0.0129181
NZ_CP013479.1	5653	73	0.0129135
NZ_CP013696.1	5901	73	0.0123708
NZ_CP013989.1	5814	72	0.0123839
NZ_CP013993.1	6675	73	0.0109363
NZ_CP014866.1	5901	78	0.0132181
NZ_CP014948.1	5845	76	0.0130026
NZ_CP014999.1	6555	77	0.0117468
NZ_CP015001.1	6206	77	0.0124073
NZ_CP015002.1	6441	78	0.0121099
NZ_CP015003.1	6609	77	0.0116508
NZ_CP015117.1	6354	74	0.0116462
NZ_CP015377.1	6586	74	0.011236
NZ_CP015647.1	5890	72	0.0122241
NZ_CP015648.1	5848	76	0.0129959
NZ_CP015649.1	6011	76	0.0126435
NZ_CP015650.1	5897	77	0.0130575
NZ_CP015877.1	5672	75	0.0132228
NZ_CP016214.1	5845	73	0.0124893
NZ_CP016955.1	6943	77	0.0110903
NZ_CP017099.1	6125	74	0.0120816
NZ_CP017149.1	5709	75	0.0131372
NZ_CP017293.1	6236	81	0.0129891
NZ_CP017306.1	5788	76	0.0131306
NZ_CP017353.1	6407	73	0.0113938
NZ_CP017969.1	6217	77	0.0123854
NZ_CP019338.1	6063	79	0.0130299
NZ_CP020560.1	5602	66	0.0117815
NZ_CP020603.1	6603	77	0.0116614
NZ_CP020659.1	5797	74	0.0127652
NZ_CP020703.1	6397	80	0.0125059
NZ_CP020704.1	6501	80	0.0123058
NZ_CP021380.2	6356	78	0.0122719
NZ_CP021774.1	6486	77	0.0118717
NZ_CP021775.1	6774	77	0.011367
NZ_CP021999.1	6075	73	0.0120165
NZ_CP022000.1	6670	76	0.0113943
NZ_CP022001.1	6933	83	0.0119717
NZ_CP022002.1	6540	77	0.0117737
NZ_CP022478.1	6243	77	0.0123338
NZ_CP022525.1	6451	77	0.0119361
NZ_CP022526.1	6458	77	0.0119232
NZ_CP023255.1	6389	75	0.0117389
NZ_CP023316.1	6350	77	0.012126
NZ_CP024024.1	6607	78	0.0118057
NZ_CP024477.1	6118	78	0.0127493
NZ_CP024630.1	6420	77	0.0119938
NZ_CP025049.1	6103	73	0.0119613
NZ_CP025050.1	6213	75	0.0120715
NZ_CP025051.1	5931	76	0.012814
NZ_CP025053.1	5924	76	0.0128292
NZ_CP025055.2	6215	78	0.0125503
NZ_CP025056.2	6215	78	0.0125503
NZ_CP026680.1	6177	71	0.0114943
NZ_CP027165.1	5893	75	0.012727
NZ_CP027166.1	6687	77	0.0115149
NZ_CP027169.1	6091	73	0.0119849
NZ_CP027171.1	6167	76	0.0123237
NZ_CP027172.1	6809	77	0.0113086
NZ_CP027174.1	6449	81	0.0125601
NZ_CP027538.1	6270	81	0.0129187
NZ_CP027857.1	5707	75	0.0131418
NZ_CP028132.1	5730	75	0.013089
NZ_CP028162.1	6557	78	0.0118957
NZ_CP028330.1	6153	78	0.0126767
NZ_CP028331.1	5780	72	0.0124567
NZ_CP028332.1	5880	74	0.012585
NZ_CP028368.1	5794	77	0.0132896
NZ_CP028584.2	6263	82	0.0130928
NZ_CP028848.1	5960	75	0.0125839
NZ_CP028849.1	5936	74	0.0124663
NZ_CP028917.1	6368	84	0.013191
NZ_CP028959.1	5943	74	0.0124516
NZ_CP029088.1	6648	77	0.0115824
NZ_CP029089.1	6279	80	0.0127409
NZ_CP029090.1	6884	76	0.0110401
NZ_CP029093.1	6095	72	0.011813
NZ_CP029097.1	6614	76	0.0114908
NZ_CP029147.1	6198	73	0.011778
NZ_CP029148.1	6769	74	0.0109322
NZ_CP029605.1	6624	76	0.0114734
NZ_CP029660.1	6005	73	0.0121565
NZ_CP029707.1	6540	81	0.0123853
NZ_CP029713.1	6667	81	0.0121494
NZ_CP029745.1	6282	76	0.0120981
NZ_CP030075.1	6181	76	0.0122957
NZ_CP030327.1	6146	72	0.0117149
NZ_CP030328.1	6143	71	0.0115579
NZ_CP030351.1	5729	74	0.0129167
NZ_CP030861.1	6403	74	0.0115571
NZ_CP030910.1	6273	77	0.0122748
NZ_CP030911.1	6458	81	0.0125426
NZ_CP030912.1	6657	74	0.0111161
NZ_CP030913.1	6353	81	0.0127499
NZ_CP031449.2	6443	73	0.0113301
NZ_CP031659.1	6037	74	0.0122577
NZ_CP031660.1	5949	73	0.012271
NZ_CP031677.1	6298	83	0.0131788
NZ_CP031876.1	6437	79	0.0122728
NZ_CP031877.1	6441	79	0.0122652
NZ_CP031878.1	6441	79	0.0122652
NZ_CP031879.1	6028	75	0.0124419
NZ_CP032126.1	5825	75	0.0128755
NZ_CP032257.1	6437	80	0.0124281
NZ_CP032540.1	5432	66	0.0121502
NZ_CP032541.1	5736	75	0.0130753
NZ_CP032552.1	6312	70	0.01109
NZ_CP032569.1	6304	71	0.0112627
NZ_CP032761.1	6558	76	0.0115889
NZ_CP033439.1	6285	74	0.0117741
NZ_CP033684.1	6576	82	0.0124696
NZ_CP033685.1	6171	78	0.0126398
NZ_CP033686.1	6156	76	0.0123457
NZ_CP033771.1	6325	76	0.0120158
NZ_CP033832.1	6458	75	0.0116135
NZ_CP033833.1	6505	79	0.0121445
NZ_CP033835.1	6730	76	0.0112927
NZ_CP033843.1	6348	77	0.0121298
NZ_CP034244.1	5946	78	0.0131181
NZ_CP034354.1	6462	77	0.0119158
NZ_CP034369.1	6359	73	0.0114798
NZ_CP034409.1	6419	74	0.0115283
NZ_CP034429.1	5696	75	0.0131671
NZ_CP034430.1	6155	75	0.0121852
NZ_CP034436.1	6184	70	0.0113195
NZ_CP034908.1	5690	75	0.013181
NZ_CP035739.1	6377	75	0.011761
NZ_CP037925.1	5870	75	0.0127768
NZ_CP037926.1	5867	75	0.0127834
NZ_CP038661.1	5651	73	0.0129181
NZ_CP039293.1	6367	76	0.0119365
NZ_CP039749.1	6338	82	0.0129378
NZ_CP039988.1	6267	74	0.0118079
NZ_CP039990.1	6128	74	0.0120757
NZ_CP040127.1	5979	75	0.0125439
NZ_CP040684.1	6214	72	0.0115867
NZ_CP041008.1	5697	75	0.0131648
NZ_CP041013.1	6322	82	0.0129706
NZ_CP041354.1	6017	66	0.0109689
NZ_CP041771.1	6123	72	0.0117589
NZ_CP041772.1	5944	76	0.012786
NZ_CP041773.1	6137	75	0.012221
NZ_CP041774.1	6307	73	0.0115744
NZ_CP041785.1	6147	79	0.0128518
NZ_CP041786.1	5937	77	0.0129695
NZ_CP041787.1	6439	83	0.0128902
NZ_CP041945.1	6325	75	0.0118577
NZ_CP042269.1	5544	74	0.0133478
NZ_CP043328.1	6523	76	0.0116511
NZ_CP043483.1	5968	74	0.0123995
NZ_CP043549.1	5942	69	0.0116123
NZ_CP044006.1	6300	77	0.0122222
NZ_CP044533.1	5755	75	0.0130321
NZ_CP045002.1	6139	73	0.0118912
NZ_CP045552.2	6427	79	0.0122919
NZ_CP045739.1	6696	77	0.0114994
NZ_CP045768.1	5839	75	0.0128447
NZ_CP045916.1	6250	75	0.012
NZ_CP046060.1	6910	82	0.0118669
NZ_CP046061.1	6913	82	0.0118617
NZ_CP046069.1	6210	73	0.0117552
NZ_CP046402.2	6561	79	0.0120408
NZ_CP046403.1	6644	76	0.0114389
NZ_CP046404.1	6386	77	0.0120576
NZ_CP046405.1	6023	72	0.0119542
NZ_CP046406.2	6795	78	0.011479
NZ_CP046602.1	5850	67	0.011453
NZ_CP047061.1	5279	63	0.0119341
NZ_CP047062.1	5225	62	0.011866
NZ_CP047063.1	5335	66	0.0123711
NZ_CP047064.1	5200	60	0.0115385
NZ_CP047065.1	5347	68	0.0127174
NZ_CP047066.1	5016	54	0.0107656
NZ_CP047067.1	5684	75	0.0131949
NZ_CP047068.1	5691	75	0.0131787
NZ_CP047069.1	5548	73	0.0131579
NZ_CP047070.1	5569	73	0.0131083
NZ_CP047592.1	5807	75	0.0129154
NZ_CP047697.1	5837	75	0.0128491
NZ_CP049161.1	5699	73	0.0128093
NZ_CP050052.1	5697	75	0.0131648
NZ_CP050053.1	5693	75	0.0131741
NZ_CP050054.1	5697	75	0.0131648
NZ_CP050322.1	6018	73	0.0121303
NZ_CP050323.1	6355	77	0.0121164
NZ_CP050324.1	5845	72	0.0123182
NZ_CP050325.1	5954	74	0.0124286
NZ_CP050326.1	6161	77	0.012498
NZ_CP050327.1	5515	71	0.012874
NZ_CP050328.1	5568	71	0.0127514
NZ_CP050329.1	5738	75	0.0130708
NZ_CP050330.1	5834	76	0.0130271
NZ_CP050331.1	5976	75	0.0125502
NZ_CP050332.1	6446	73	0.0113249
NZ_CP050333.1	5823	73	0.0125365
NZ_CP050334.1	5638	74	0.0131252
NZ_CP050335.1	6008	76	0.0126498
NZ_CP051547.1	5717	75	0.0131188
NZ_CP051766.1	6278	77	0.0122651
NZ_CP051768.1	6233	75	0.0120327
NZ_CP051770.1	6259	77	0.0123023
NZ_CP052759.1	6188	74	0.0119586
NZ_CP053028.1	5671	74	0.0130488
NZ_CP053110.1	5686	75	0.0131903
NZ_CP053111.1	5685	75	0.0131926
NZ_CP053112.1	5685	75	0.0131926
NZ_CP053113.1	5686	75	0.0131903
NZ_CP053114.1	5685	75	0.0131926
NZ_CP053115.1	5685	75	0.0131926
NZ_CP053116.1	5685	75	0.0131926
NZ_CP053117.1	5686	74	0.0130144
NZ_CP053118.1	5685	75	0.0131926
NZ_CP053119.1	5687	74	0.0130121
NZ_CP053390.1	6062	76	0.0125371
NZ_CP053686.1	5782	75	0.0129713
NZ_CP053687.1	6358	75	0.0117962
NZ_CP053705.1	5965	75	0.0125733
NZ_CP053706.1	7023	78	0.0111064
NZ_CP053747.1	6420	76	0.011838
NZ_CP053917.1	6397	76	0.0118806
NZ_CP053922.1	5984	75	0.0125334
NZ_CP054472.1	5826	72	0.0123584
NZ_CP054473.1	6212	72	0.0115905
NZ_CP054581.1	6754	82	0.012141
NZ_CP054591.1	6266	81	0.0129269
NZ_CP054623.1	6052	75	0.0123926
NZ_CP054786.1	6052	75	0.0123926
NZ_CP054787.1	6398	75	0.0117224
NZ_CP054789.1	6311	74	0.0117256
NZ_CP054791.1	6389	72	0.0112694
NZ_CP054792.1	6165	71	0.0115166
NZ_CP054793.1	5537	69	0.0124616
NZ_CP054794.1	6037	75	0.0124234
NZ_CP054843.1	6353	79	0.0124351
NZ_CP054844.1	6609	79	0.0119534
NZ_CP054845.1	6675	76	0.0113858
NZ_CP056089.1	6231	76	0.0121971
NZ_CP056090.1	6641	76	0.0114441
NZ_CP056092.1	6629	78	0.0117665
NZ_CP056093.1	5981	72	0.0120381
NZ_CP056094.1	6525	80	0.0122605
NZ_CP056095.1	5946	75	0.0126135
NZ_CP056098.1	5756	74	0.0128562
NZ_CP056100.1	6582	74	0.0112428
NZ_CP056101.1	5737	68	0.0118529
NZ_CP056774.1	6197	79	0.0127481
NZ_CP058257.1	6047	74	0.0122375
NZ_CP058323.1	6005	75	0.0124896
NZ_CP058331.1	5953	76	0.0127667
NZ_CP058332.1	5955	76	0.0127624
NZ_CP058333.1	5951	76	0.012771
NZ_CP059063.1	6222	77	0.0123754
NZ_CP059995.1	6627	79	0.0119209
NZ_CP060086.1	6161	73	0.0118487
NZ_CP060240.1	5970	75	0.0125628
NZ_CP060241.1	5765	74	0.0128361
NZ_CP060242.1	6427	76	0.0118251
NZ_CP060243.1	6607	78	0.0118057
NZ_CP060392.1	6352	79	0.012437
NZ_CP060703.1	5861	75	0.0127965
NZ_CP061034.1	6037	74	0.0122577
NZ_CP061376.1	5855	74	0.0126388
NZ_CP061699.1	5974	78	0.0130566
NZ_CP061777.1	6642	80	0.0120446
NZ_CP061778.1	6288	75	0.0119275
NZ_CP061779.1	6555	78	0.0118993
NZ_CP061780.1	6176	74	0.0119819
NZ_CP061850.1	6371	75	0.0117721
NZ_CP062219.1	5960	75	0.0125839
NZ_CP063047.1	5686	76	0.0133662
NZ_CP063237.1	6268	80	0.0127632
NZ_CP064392.1	6177	75	0.0121418
NZ_CP064393.1	6239	73	0.0117006
NZ_CP064395.1	6317	76	0.012031
NZ_CP064397.1	6333	76	0.0120006
NZ_CP064399.1	5999	74	0.0123354
NZ_CP064401.1	6431	73	0.0113513
NZ_CP064403.1	5998	75	0.0125042
NZ_CP065374.1	6222	75	0.012054
NZ_CP065412.1	6473	75	0.0115866
NZ_CP065417.1	6338	76	0.0119912
NZ_CP065848.1	6558	77	0.0117414
NZ_CP065865.1	6696	77	0.0114994
NZ_CP065866.1	5911	75	0.0126882
NZ_CP065867.1	6098	76	0.0124631
NZ_CP065947.1	6249	75	0.0120019
NZ_CP065948.1	6086	75	0.0123234
NZ_CP065966.1	6351	73	0.0114943
NZ_CP068238.1	5895	64	0.0108567
NZ_CP068239.1	6423	73	0.0113654
NZ_CP068678.1	6444	81	0.0125698
NZ_CP069198.1	6410	75	0.0117005
NZ_CP069323.1	5738	72	0.0125479
NZ_CP069324.1	5720	72	0.0125874
NZ_CP069325.1	5740	72	0.0125436
NZ_CP070355.1	5834	76	0.0130271
NZ_CP070467.1	6161	74	0.012011
NZ_CP070471.1	6245	75	0.0120096
NZ_CP071730.1	6102	75	0.0122911
NZ_CP071731.1	6103	75	0.012289
NZ_CP071947.1	5847	75	0.0128271
NZ_CP072783.1	6067	74	0.0121971
NZ_CP073080.1	6598	74	0.0112155
NZ_CP073082.1	5809	77	0.0132553
NZ_CP075176.1	6454	75	0.0116207
NZ_CP077971.1	6089	73	0.0119888
NZ_CP077977.1	6094	73	0.011979
NZ_CP077981.1	5798	74	0.012763
NZ_CP077985.1	6211	74	0.0119143
NZ_CP077988.1	6114	74	0.0121034
NZ_CP077994.1	6393	75	0.0117316
NZ_CP077997.1	6080	75	0.0123355
NZ_CP077999.1	6421	75	0.0116804
NZ_CP078002.1	6208	71	0.0114369
NZ_CP078004.1	6390	75	0.0117371
NZ_CP078006.1	6585	75	0.0113895
NZ_CP078007.1	6028	74	0.012276
NZ_CP078009.1	6146	75	0.0122031
NZ_CP080007.1	5723	73	0.0127555
NZ_CP080011.1	6174	74	0.0119857
NZ_CP080280.1	6199	75	0.0120987
NZ_CP080281.1	5795	74	0.0127696
NZ_CP080285.1	5547	68	0.0122589
NZ_CP080286.1	5765	71	0.0123157
NZ_CP080288.1	5596	68	0.0121515
NZ_CP080289.1	6388	76	0.0118973
NZ_CP080369.1	6319	77	0.0121855
NZ_CP080511.1	5951	76	0.012771
NZ_CP080518.1	5824	76	0.0130495
NZ_CP081202.1	6795	80	0.0117734
NZ_CP081287.1	6134	75	0.0122269
NZ_CP081345.1	6353	79	0.0124351
NZ_CP081346.1	6273	77	0.0122748
NZ_CP082821.1	6764	75	0.0110881
NZ_CP082822.1	6688	78	0.0116627
NZ_CP082823.1	6807	76	0.011165
NZ_CP083366.1	6392	76	0.0118899
NZ_CP086010.1	6121	74	0.0120895
NZ_CP086016.1	6631	78	0.0117629
NZ_CP086064.1	6542	77	0.0117701
NZ_CP086122.1	5707	75	0.0131418
NZ_CP087673.1	6567	81	0.0123344
NZ_CP087674.1	6454	75	0.0116207
NZ_CP087675.1	6420	75	0.0116822
NZ_CP089236.1	6642	69	0.0103884
NZ_CP089238.1	5849	75	0.0128227
NZ_CP089745.1	5818	76	0.0130629
NZ_CP089849.1	6132	73	0.0119048
NZ_CP090348.1	5841	74	0.0126691
NZ_HG974234.1	6348	78	0.0122873
NZ_LN831024.1	5771	74	0.0128227
NZ_LN870292.1	5651	73	0.0129181
NZ_LN871187.1	5708	75	0.0131395
NZ_LR130527.1	5872	77	0.0131131
NZ_LR130528.1	5958	73	0.0122524
NZ_LR130530.1	5855	76	0.0129804
NZ_LR130531.1	5871	75	0.0127747
NZ_LR130533.1	6426	75	0.0116713
NZ_LR130534.1	6393	75	0.0117316
NZ_LR130535.1	5857	76	0.0129759
NZ_LR130536.1	5854	76	0.0129826
NZ_LR130537.1	5854	76	0.0129826
NZ_LR134308.1	6324	74	0.0117015
NZ_LR134309.1	6346	73	0.0115033
NZ_LR134330.1	6229	74	0.0118799
NZ_LR134342.1	5813	75	0.0129021
NZ_LR657304.1	5812	75	0.0129043
NZ_LR739068.1	6071	74	0.0121891
NZ_LR739069.1	6325	75	0.0118577
NZ_LR739071.1	5898	77	0.0130553
NZ_LR890619.1	5712	75	0.0131303
NZ_LR898867.1	6391	79	0.0123611
NZ_LS998783.1	6758	77	0.0113939
NZ_LT608330.1	5958	78	0.0130916
NZ_LT673656.1	5712	76	0.0133053

## Sheet: Hits of glpt_2 in the NCBI set
NCBI Id	Hits of glpt_2 in the genome
NZ_AAQW01000001.1	1
NZ_AFXJ01000001.1	1
NZ_AFXK01000001.1	1
NZ_AP014622.1	1
NZ_AP014646.1	1
NZ_AP014651.1	1
NZ_AP014839.1	2
NZ_AP017302.1	1
NZ_AP024513.1	2
NZ_CM001020.1	1
NZ_CP006980.1	1
NZ_CP006981.1	1
NZ_CP006982.1	1
NZ_CP006983.1	1
NZ_CP006984.1	1
NZ_CP006985.1	1
NZ_CP007147.1	2
NZ_CP007224.1	1
NZ_CP007399.1	1
NZ_CP008739.1	2
NZ_CP008749.1	1
NZ_CP008856.2	2
NZ_CP008857.1	1
NZ_CP008858.2	1
NZ_CP008859.2	1
NZ_CP008860.2	1
NZ_CP008861.1	1
NZ_CP008862.2	1
NZ_CP008863.1	1
NZ_CP008864.2	1
NZ_CP008865.2	1
NZ_CP008866.2	1
NZ_CP008867.1	2
NZ_CP008868.1	1
NZ_CP008869.2	2
NZ_CP008870.2	1
NZ_CP008871.2	1
NZ_CP008872.2	1
NZ_CP008873.1	1
NZ_CP010555.1	1
NZ_CP011317.1	1
NZ_CP011369.1	1
NZ_CP011857.1	1
NZ_CP012001.1	1
NZ_CP012066.1	1
NZ_CP012578.1	1
NZ_CP012579.1	1
NZ_CP012580.1	1
NZ_CP012581.1	1
NZ_CP012582.1	1
NZ_CP012583.1	1
NZ_CP012584.1	1
NZ_CP012585.1	1
NZ_CP012679.1	1
NZ_CP012901.1	1
NZ_CP013113.1	1
NZ_CP013245.1	1
NZ_CP013477.1	2
NZ_CP013478.1	2
NZ_CP013479.1	2
NZ_CP013696.1	1
NZ_CP013989.1	1
NZ_CP013993.1	1
NZ_CP014866.1	1
NZ_CP014948.1	1
NZ_CP014999.1	1
NZ_CP015001.1	1
NZ_CP015002.1	1
NZ_CP015003.1	1
NZ_CP015117.1	1
NZ_CP015377.1	1
NZ_CP015647.1	2
NZ_CP015648.1	2
NZ_CP015649.1	1
NZ_CP015650.1	1
NZ_CP015877.1	2
NZ_CP016214.1	1
NZ_CP016955.1	1
NZ_CP017099.1	1
NZ_CP017149.1	1
NZ_CP017293.1	2
NZ_CP017306.1	1
NZ_CP017353.1	1
NZ_CP017969.1	1
NZ_CP019338.1	1
NZ_CP020560.1	1
NZ_CP020603.1	1
NZ_CP020659.1	1
NZ_CP020703.1	1
NZ_CP020704.1	1
NZ_CP021380.2	1
NZ_CP021774.1	1
NZ_CP021775.1	1
NZ_CP021999.1	1
NZ_CP022000.1	1
NZ_CP022001.1	1
NZ_CP022002.1	1
NZ_CP022478.1	1
NZ_CP022525.1	1
NZ_CP022526.1	1
NZ_CP023255.1	1
NZ_CP023316.1	1
NZ_CP024024.1	1
NZ_CP024477.1	1
NZ_CP024630.1	1
NZ_CP025049.1	1
NZ_CP025050.1	1
NZ_CP025051.1	1
NZ_CP025053.1	1
NZ_CP025055.2	1
NZ_CP025056.2	1
NZ_CP026680.1	1
NZ_CP027165.1	2
NZ_CP027166.1	1
NZ_CP027169.1	2
NZ_CP027171.1	1
NZ_CP027172.1	1
NZ_CP027174.1	2
NZ_CP027538.1	1
NZ_CP027857.1	1
NZ_CP028132.1	1
NZ_CP028162.1	1
NZ_CP028330.1	1
NZ_CP028331.1	1
NZ_CP028332.1	1
NZ_CP028368.1	1
NZ_CP028584.2	1
NZ_CP028848.1	1
NZ_CP028849.1	1
NZ_CP028917.1	1
NZ_CP028959.1	1
NZ_CP029088.1	1
NZ_CP029089.1	2
NZ_CP029090.1	1
NZ_CP029093.1	2
NZ_CP029097.1	1
NZ_CP029147.1	1
NZ_CP029148.1	1
NZ_CP029605.1	1
NZ_CP029660.1	1
NZ_CP029707.1	2
NZ_CP029713.1	1
NZ_CP029745.1	2
NZ_CP030075.1	1
NZ_CP030327.1	1
NZ_CP030328.1	1
NZ_CP030351.1	1
NZ_CP030861.1	1
NZ_CP030910.1	1
NZ_CP030911.1	1
NZ_CP030912.1	1
NZ_CP030913.1	1
NZ_CP031449.2	1
NZ_CP031659.1	1
NZ_CP031660.1	1
NZ_CP031677.1	1
NZ_CP031876.1	1
NZ_CP031877.1	1
NZ_CP031878.1	1
NZ_CP031879.1	1
NZ_CP032126.1	1
NZ_CP032257.1	2
NZ_CP032540.1	1
NZ_CP032541.1	1
NZ_CP032552.1	1
NZ_CP032569.1	1
NZ_CP032761.1	1
NZ_CP033439.1	1
NZ_CP033684.1	1
NZ_CP033685.1	1
NZ_CP033686.1	1
NZ_CP033771.1	1
NZ_CP033832.1	1
NZ_CP033833.1	1
NZ_CP033835.1	2
NZ_CP033843.1	1
NZ_CP034244.1	1
NZ_CP034354.1	1
NZ_CP034369.1	1
NZ_CP034409.1	1
NZ_CP034429.1	1
NZ_CP034430.1	1
NZ_CP034436.1	1
NZ_CP034908.1	1
NZ_CP035739.1	1
NZ_CP037925.1	1
NZ_CP037926.1	1
NZ_CP038661.1	1
NZ_CP039293.1	1
NZ_CP039749.1	1
NZ_CP039988.1	1
NZ_CP039990.1	1
NZ_CP040127.1	1
NZ_CP040684.1	1
NZ_CP041008.1	1
NZ_CP041013.1	1
NZ_CP041354.1	1
NZ_CP041771.1	1
NZ_CP041772.1	1
NZ_CP041773.1	2
NZ_CP041774.1	1
NZ_CP041785.1	1
NZ_CP041786.1	1
NZ_CP041787.1	1
NZ_CP041945.1	1
NZ_CP042269.1	1
NZ_CP043328.1	1
NZ_CP043483.1	1
NZ_CP043549.1	1
NZ_CP044006.1	1
NZ_CP044533.1	1
NZ_CP045002.1	1
NZ_CP045552.2	2
NZ_CP045739.1	1
NZ_CP045768.1	1
NZ_CP045916.1	1
NZ_CP046060.1	2
NZ_CP046061.1	2
NZ_CP046069.1	1
NZ_CP046402.2	1
NZ_CP046403.1	1
NZ_CP046404.1	1
NZ_CP046405.1	1
NZ_CP046406.2	1
NZ_CP046602.1	1
NZ_CP047061.1	1
NZ_CP047062.1	1
NZ_CP047063.1	1
NZ_CP047064.1	1
NZ_CP047065.1	1
NZ_CP047066.1	1
NZ_CP047067.1	1
NZ_CP047068.1	1
NZ_CP047069.1	1
NZ_CP047070.1	1
NZ_CP047592.1	1
NZ_CP047697.1	1
NZ_CP049161.1	1
NZ_CP050052.1	1
NZ_CP050053.1	1
NZ_CP050054.1	1
NZ_CP050322.1	1
NZ_CP050323.1	2
NZ_CP050324.1	2
NZ_CP050325.1	1
NZ_CP050326.1	1
NZ_CP050327.1	1
NZ_CP050328.1	2
NZ_CP050329.1	1
NZ_CP050330.1	1
NZ_CP050331.1	1
NZ_CP050332.1	1
NZ_CP050333.1	1
NZ_CP050334.1	2
NZ_CP050335.1	1
NZ_CP051547.1	1
NZ_CP051766.1	1
NZ_CP051768.1	1
NZ_CP051770.1	1
NZ_CP052759.1	1
NZ_CP053028.1	1
NZ_CP053110.1	1
NZ_CP053111.1	1
NZ_CP053112.1	1
NZ_CP053113.1	1
NZ_CP053114.1	1
NZ_CP053115.1	1
NZ_CP053116.1	1
NZ_CP053117.1	1
NZ_CP053118.1	1
NZ_CP053119.1	2
NZ_CP053390.1	1
NZ_CP053686.1	1
NZ_CP053687.1	1
NZ_CP053705.1	1
NZ_CP053706.1	2
NZ_CP053747.1	1
NZ_CP053917.1	1
NZ_CP053922.1	1
NZ_CP054472.1	1
NZ_CP054473.1	1
NZ_CP054581.1	2
NZ_CP054591.1	2
NZ_CP054623.1	2
NZ_CP054786.1	2
NZ_CP054787.1	2
NZ_CP054789.1	2
NZ_CP054791.1	1
NZ_CP054792.1	1
NZ_CP054793.1	1
NZ_CP054794.1	1
NZ_CP054843.1	1
NZ_CP054844.1	2
NZ_CP054845.1	1
NZ_CP056089.1	1
NZ_CP056090.1	1
NZ_CP056092.1	1
NZ_CP056093.1	1
NZ_CP056094.1	1
NZ_CP056095.1	1
NZ_CP056098.1	1
NZ_CP056100.1	1
NZ_CP056101.1	1
NZ_CP056774.1	2
NZ_CP058257.1	1
NZ_CP058323.1	2
NZ_CP058331.1	1
NZ_CP058332.1	1
NZ_CP058333.1	1
NZ_CP059063.1	1
NZ_CP059995.1	1
NZ_CP060086.1	1
NZ_CP060240.1	1
NZ_CP060241.1	2
NZ_CP060242.1	1
NZ_CP060243.1	1
NZ_CP060392.1	1
NZ_CP060703.1	1
NZ_CP061034.1	2
NZ_CP061376.1	1
NZ_CP061699.1	1
NZ_CP061777.1	2
NZ_CP061778.1	1
NZ_CP061779.1	2
NZ_CP061780.1	1
NZ_CP061850.1	1
NZ_CP062219.1	1
NZ_CP063047.1	1
NZ_CP063237.1	2
NZ_CP064392.1	2
NZ_CP064393.1	1
NZ_CP064395.1	1
NZ_CP064397.1	1
NZ_CP064399.1	1
NZ_CP064401.1	1
NZ_CP064403.1	1
NZ_CP065374.1	1
NZ_CP065412.1	1
NZ_CP065417.1	1
NZ_CP065848.1	1
NZ_CP065865.1	1
NZ_CP065866.1	1
NZ_CP065867.1	1
NZ_CP065947.1	1
NZ_CP065948.1	1
NZ_CP065966.1	1
NZ_CP068238.1	1
NZ_CP068239.1	1
NZ_CP068678.1	2
NZ_CP069198.1	1
NZ_CP069323.1	2
NZ_CP069324.1	2
NZ_CP069325.1	2
NZ_CP070355.1	1
NZ_CP070467.1	1
NZ_CP070471.1	1
NZ_CP071730.1	1
NZ_CP071731.1	1
NZ_CP071947.1	1
NZ_CP072783.1	1
NZ_CP073080.1	1
NZ_CP073082.1	1
NZ_CP075176.1	1
NZ_CP077971.1	2
NZ_CP077977.1	1
NZ_CP077981.1	1
NZ_CP077985.1	2
NZ_CP077988.1	2
NZ_CP077994.1	1
NZ_CP077997.1	2
NZ_CP077999.1	1
NZ_CP078002.1	1
NZ_CP078004.1	1
NZ_CP078006.1	1
NZ_CP078007.1	1
NZ_CP078009.1	2
NZ_CP080007.1	2
NZ_CP080011.1	1
NZ_CP080280.1	1
NZ_CP080281.1	1
NZ_CP080285.1	1
NZ_CP080286.1	1
NZ_CP080288.1	1
NZ_CP080289.1	1
NZ_CP080369.1	1
NZ_CP080511.1	1
NZ_CP080518.1	2
NZ_CP081202.1	1
NZ_CP081287.1	2
NZ_CP081345.1	1
NZ_CP081346.1	1
NZ_CP082821.1	1
NZ_CP082822.1	2
NZ_CP082823.1	1
NZ_CP083366.1	1
NZ_CP086010.1	2
NZ_CP086016.1	1
NZ_CP086064.1	1
NZ_CP086122.1	1
NZ_CP087673.1	1
NZ_CP087674.1	1
NZ_CP087675.1	1
NZ_CP089236.1	2
NZ_CP089238.1	1
NZ_CP089745.1	1
NZ_CP089849.1	1
NZ_CP090348.1	2
NZ_HG974234.1	2
NZ_LN831024.1	1
NZ_LN870292.1	2
NZ_LN871187.1	1
NZ_LR130527.1	1
NZ_LR130528.1	1
NZ_LR130530.1	1
NZ_LR130531.1	1
NZ_LR130533.1	1
NZ_LR130534.1	1
NZ_LR130535.1	1
NZ_LR130536.1	1
NZ_LR130537.1	1
NZ_LR134308.1	1
NZ_LR134309.1	1
NZ_LR134330.1	1
NZ_LR134342.1	1
NZ_LR657304.1	1
NZ_LR739068.1	1
NZ_LR739069.1	1
NZ_LR739071.1	1
NZ_LR890619.1	1
NZ_LR898867.1	1
NZ_LS998783.1	1
NZ_LT608330.1	1
NZ_LT673656.1	1
