# Supplementary material
Source: MDPI journal article supplement (https://www.mdpi.com/2674-1334/1/4/20)
Supplement: s1 [file s1 › Supplementary_material_3.fasta]

>0101 Glycerol-3-phosphate transporter glpt_1
MFGIFRPAPHQAPLPDAEVDSTYRRLRWQIFAGIFIGYAGYYLLRKNFSLAMPYLIEDGY
SRGQLGVAMSAIAIAYGLSKFIMGLVSDRSNPRVFLPFGLLVSAAVMFIFGFAHWATSSV
AIMFVLLFINGWAQGMGWPPSGRTMVHWWSQKERGSVVSVWNVAHNVGGGLIGPLFLLGL
ALFGDWRSAFYVPAIVAVGVAVFAYFAMRDTPQSCGLPPIEKHKDDYPEGYDEHHERELS
TKEIFVTYVLRNKLLWYIALANVFVYLLRYGVLDWAPTYLKEAKHFNVDKSSWAYFFYEW
AGIPGTLLCGWLSDKLFKGNRGATGVVFMILVTVGTLIYWLNPAGNPAIDMAALIMIGFL
IYGPVMLIGLQALELAPKKAAGTAAGFTGLFGYLGGSVAANALVGYTVDHFGWDGGFKLL
IGACLLAILFLCLTLRKPAVQAAPQQAG
>0101 Glycerol-3-phosphate transporter glpt_2
MNQRPGTALPSSPVSSFQRWRLQIFAITWLAYAAFYFTRKAFSVAKLGIAEDPDFQLDKM
AMADLDAIYLAAYAVGQFTWGVLADRFGPRIVVFGGLLISALAAMVMGTFATLPIFATCM
VVQGLAQSTGWSGLCKNIGSFFATHERGRVLGLWSTCYAFGGLVASPFAGWWAYSVFGTW
HAAFYSSAAVVGGVALLFLLLQRNRPEDVGHPPVEPQVASEAVRYAGFRPEGGNGGSLQV
LAKVVRNRTVLCLGLAYFLLKPARYAILLWGPVIVYERMPALGKVGAAIVPTAFEVAGLL
GPILIGFASDKLFGARRMPACVISLLALTVCLALFVPAMTTGSIPIVVGLLFMMGLTLYG
PDSMICGSAAIDFGTGEAAGTASGFVNGCGSVGAILGGLLPGYFDTYTVFIGFTIAALIA
TAVLLPHWNSRPDGAVKGHRNIPSLGDFRPIRS
>0101 Membrane sensor protein UhpC
MNNHNGTLHRGWQSLQRWRIQIFVITWLAYAAFYFTRKAFSVAKLGIAEDPSFELDKSAM
ADLDALYLAAYAVGQFMWGVFADRFGTRVVVLGGLLTSALAALAMGTFATLPIFAACMVV
QGLAQSTGWSGLCKNIGAFFATYERGRVLGLWSTCYAFGGLVATPFAGWCAYRLTHDWRM
AFLSSAGVVLAVAVLFFFLQRNRPQDVGLPPVEAEAAPPADAPRPSHSAALLKALRNPHV
LVLGIAYFLLKPARYAILLWGPVIIYERMPEIGKVASAIVPSAFEVAGLAGPILIGLASD
KLFGARRMPACVLSLAALTLSLALFVPAMQSGSLYLVVGLLFMMGVTLYGPDSMISGAAA
IDFGTSEAAGTATGFVNGCGSVGAILGGLLPGYFDTLTVFFVFTATALLASLLLVPFWNS
RPGARRVEPKAHAGGPLLAAGKPR
>0201 Glycerol-3-phosphate transporter glpt_1
MFGIFRPAPHQAPLPDAEVDSTYRRLRWQIFAGIFIGYAGYYLLRKNFSLAMPYLIEDGY
SRGQLGVAMSAIAIAYGLSKFIMGLVSDRSNPRVFLPFGLLVSAAVMFIFGFAHWATSSV
AIMFVLLFINGWAQGMGWPPSGRTMVHWWSQKERGSVVSVWNVAHNVGGGLIGPLFLLGL
ALFGDWRSAFYVPAIVAVGVAVFAYFAMRDTPQSCGLPPIEKHKDDYPEGYDEHHERELS
TKEIFVTYVLRNKLLWYIALANVFVYLLRYGVLDWAPTYLKEAKHFNVDKSSWAYFFYEW
AGIPGTLLCGWLSDKLFKGNRGATGVVFMILVTVGTLIYWLNPAGNPAIDMAALIMIGFL
IYGPVMLIGLQALELAPKKAAGTAAGFTGLFGYLGGSVAANALVGYTVDHFGWDGGFKLL
IGACLLAILFLCLTLRKPAVQAAPQQAGG
>0201 Glycerol-3-phosphate transporter glpt_2
MNQRPGTALPSSPVSSFQRWRLQIFAITWLAYAAFYFTRKAFSVAKLGIAEDPDFQLDKM
AMADLDAIYLAAYAVGQFTWGVLADRFGPRIVVFGGLLISALAALVMGTFATLPIFATCM
VVQGLAQSTGWSGLCKNIGSFFATHERGRVLGLWSTCYAFGGLVASPFAGWWAYSVFGTW
HAAFYSSAAVVGGVALLFLLLQRNRPEDVGHPPVEPQAASEAVRYAGFRPEGGNGGSLQV
LAKVVRNRTVLCLGLAYFLLKPARYAILLWGPVIVYERMPALGKVGAAIVPTAFEVAGLL
GPILIGFASDKLFGARRIPACVISLLALTVCLALFVPAMTTGSIPIVVGLLFMMGLTLYG
PDSMICGSAAIDFGTSEAAGTASGFVNGCGSVGAILGGLLPGYFDTYTVFIGFTVAALIA
TAVLLPHWNSRPDGAVKSHRNIPSLGDFRPIRS
>0201 Membrane sensor protein UhpC
MNNHNGTLHRGWQSLQRWRIQIFVITWLAYAAFYFTRKAFSVAKLGIAEDPSFELDKSAM
ADLDALYLAAYAVGQFMWGVFADRFGTRVVVLGGLLTSALAALVMGTFATLPIFAACMVV
QGLAQSTGWSGLCKNIGAFFATYERGRVLGLWSTCYAFGGLVATPFAGWCAYRLTHDWRM
AFLSSAGVVLAVAVLFFFLQRNRPQDVGLPPVEAEAAPPANAPRPSHSGALLKALRNPHV
LVLGIAYFLLKPARYAILLWGPVIIYERMPEIGKVASAIVPSAFEVAGLAGPILIGLASD
KLFGARRMPACVLSLAALTVSLALFVPAMQSGSLYLVVGLLFMMGVTLYGPDSMISGAAA
IDFGTSEAAGTATGFVNGCGSVGAILGGLLPGYFDTLTVFFVFTATALLASLLLVPFWNS
RPGACRVEPKAHAGGPLLAAGKPR
>0302 Glycerol-3-phosphate transporter glpt_1
MFGIFRPAPHQAPLPDAEVDSTYRRLRWQIFAGIFIGYAGYYLLRKNFSLAMPYLIEDGY
SRGQLGVAMSAIAIAYGLSKFIMGLVSDRSNPRVFLPFGLLVSAAVMFIFGFAHWATSSV
AIMFVLLFINGWAQGMGWPPSGRTMVHWWSQKERGSVVSVWNVAHNVGGGLIGPLFLLGL
ALFGDWRSAFYVPAIVAVGVAVFAYFAMRDTPQSCGLPPIEKHKDDYPEGYDEHHERELS
TKEIFVTYVLRNKLLWYIALANVFVYLLRYGVLDWAPTYLKEAKHFNVDKSSWAYFFYEW
AGIPGTLLCGWLSDKLFKGNRGATGVVFMILVTVGTLIYWLNPAGNPAIDMAALIMIGFL
IYGPVMLIGLQALELAPKKAAGTAAGFTGLFGYLGGSVAANALVGYTVDHFGWDGGFKLL
IGACLLAILFLCLTLRKPAVQAAPQQAGG
>0302 Glycerol-3-phosphate transporter glpt_2
MNQRPGTALPSSPVSSFQRWRLQIFAITWLAYAAFYFTRKAFSVAKLGIAEDPDFQLDKM
AMADLDAIYLAAYAVGQFTWGVLADRFGPRIVVFGGLLISALAALVMGTFATLPIFATCM
VVQGLAQSTGWSGLCKNIGSFFATHERGRVLGLWSTCYAFGGLVASPFAGWWAYSVFGTW
HAAFYSSAAVVGGVALLFLLLQRNRPEDVGHPPVEPQAASEAVRYAGFRPEGGNGGSLQV
LAKVVRNRTVLCLGLAYFLLKPARYAILLWGPVIVYERMPALGKVGAAIVPTAFEVAGLL
GPILIGFASDKLFGARRIPACVISLLALTVCLALFVPAMTTGSIPIVVGLLFMMGLTLYG
PDSMICGSAAIDFGTSEAAGTASGFVNGCGSVGAILGGLLPGYFDTYTVFIGFTVAALIA
TAVLLPHWNSRPDGAVKSHRNIPSLGDFRPIRS
>0302 Membrane sensor protein UhpC
MNNHNGTLHRGWQSLQRWRIQIFVITWLAYAAFYFTRKAFSVAKLGIAEDPSFELDKSAM
ADLDALYLAAYAVGQFMWGVFADRFGTRVVVLGGLLTSALAALVMGTFATLPIFAACMVV
QGLAQSTGWSGLCKNIGAFFATYERGRVLGLWSTCYAFGGLVATPFAGWCAYRLTHDWRM
AFLSSAGVVLAVAVLFFFLQRNRPQDVGLPPVEAEAAPPANAPRPSHSGALLKALRNPHV
LVLGIAYFLLKPARYAILLWGPVIIYERMPEIGKVASAIVPSAFEVAGLAGPILIGLASD
KLFGARRMPACVLSLAALTVSLALFVPAMQSGSLYLVVGLLFMMGVTLYGPDSMISGAAA
IDFGTSEAAGTATGFVNGCGSVGAILGGLLPGYFDTLTVFFVFTATALLASLLLVPFWNS
RPGACRVEPKAHAGGPLLAAGKPR
>0401 Glycerol-3-phosphate transporter  glpt_1
MFGIFRPAPHQAPLPDAEVDSTYRRLRWQIFAGIFIGYAGYYLLRKNFSLAMPYLIEDGY
SRGQLGVAMSAIAIAYGLSKFIMGLVSDRSNPRVFLPFGLLVSAAVMFIFGFAHWATSSV
AIMFVLLFINGWAQGMGWPPSGRTMVHWWSQKERGSVVSVWNVAHNVGGGLIGPLFLLGL
ALFGDWRSAFYVPAIVAVGVAVFAYFAMRDTPQSCGLPPIEKHKDDYPEGYDEHHERELS
TKEIFITYVLRNKLLWYIALANVFVYLLRYGVLDWAPTYLKEAKHFNVDKSSWAYFFYEW
AGIPGTLLCGWLSDKLFKGNRGATGVVFMILVTVGTLIYWLNPAGNPAIDMAALIMIGFL
IYGPVMLIGLQALELAPKKAAGTAAGFTGLFGYLGGSVAANALVGYTVDHFGWDGGFKLL
IGACLLAILFLCLTLRKPAVQAAPQQAG
>0401 Glycerol-3-phosphate transporter  glpt_2
MNQRPGTALPSSPVSSFQRWRLQIFAITWLAYAAFYFTRKAFSVAKLGIAEDPDFQLDKM
AMADLDAIYLAAYAVGQFTWGVLADRFGPRIVVFGGLLISALAALVMGTFATLPIFATCM
VVQGLAQSTGWSGLCKNIGSFFATHERGRVLGLWSTCYAFGGLVASPFAGWWAYSVFGTW
HAAFYSSAAVVGGVALLFLLLQRNRPEDVGHPPVEPQAASEAVRYAGFRPEGGNGGSLQV
LAKVVRNRTVLCLGLAYFLLKPARYAILLWGPVIVYERMPALGKVGAAIVPTAFEVAGLL
GPILIGFASDKLFGARRMPACVISLLALTVCLALFVPAMTTGSIPIVVGLLFMMGLTLYG
PDSMICGSAAIDFGTSEAAGTASGFVNGCGSVGAILGGLLPGYFDTYTVFIGFTIAALIA
TAVLLPHWNSRPGGARESLRNIPSLADFRPIRS
>0401 Membrane sensor protein UhpC
MNNHNGTLHRGWQSLQRWRIQIFVITWLAYAAFYFTRKAFSVAKLGIAEDPSFELDKSAM
ADLDALYLAAYAVGQFMWGVFADRFGTRVVVLGGLLTSALAALAMGTFATLPIFAACMVV
QGLAQSTGWSGLCKNIGAFFATYERGRVLGLWSTCYAFGGLVATPFAGWCAYRLTHDWRM
AFLSSAGVVLAVAVLFFFLQRNRPQDVGLPPVEAEAAPPANAPRPSHSGALLKALRNPHV
LVLGLAYFLLKPARYAILLWGPVIIYERMPEIGKVASAIVPSAFEVAGLAGPILIGLASD
KLFGARRMPACVLSLAALTVSLALFVPAMQSGSLYLVVGLLFMMGVTLYGPDSMISGAAA
IDFGTSEAAGTATGFVNGCGSVGAILGGLLPGYFDTLTVFFVFTATALLASLLLVPFWNS
RPGACRVEPKAHAGGPLLAAGKPR
>0501 Glycerol-3-phosphate transporter  glpt_1
MFGIFRPAPHQAPLPDAEVDSTYRRLRWQIFAGIFIGYAGYYLLRKNFSLAMPYLIEDGY
SRGQLGVAMSAIAIAYGLSKFIMGLVSDRSNPRVFLPFGLLVSAAVMFIFGFAHWATSSV
AIMFVLLFINGWAQGMGWPPSGRTMVHWWSQKERGSVVSVWNVAHNVGGGLIGPLFLLGL
ALFGDWRSAFYVPAIVAVGVAVFAYFAMRDTPQSCGLPPIEKHKDDYPEGYDEHHERELS
TKEIFVTYVLRNKLLWYIALANVFVYLLRYGVLDWAPTYLKEAKHFNVDKSSWAYFFYEW
AGIPGTLLCGWLSDKLFKGNRGATGVVFMILVTVGTLIYWLNPAGNPAIDMAALIMIGFL
IYGPVMLIGLQALELAPKKAAGTAAGFTGLFGYLGGSVAANALVGYTVDHFGWDGGFKLL
IGACLLAILFLCLTLRKPAVQAAPQQAG
>0501 Glycerol-3-phosphate transporter  glpt_2
MNQRPGTALPSSPVSSFQRWRLQIFAITWLAYAAFYFTRKAFSVAKLGIAEDPDFQLDKM
AMADLDAIYLAAYAVGQFTWGVLADRFGPRIVVFGGLLISALAALVMGTFATLPIFATCM
VVQGLAQSTGWSGLCKNIGSFFATHERGRVLGLWSTCYAFGGLVASPFAGWWAYSVFGTW
HAAFYSSAAVVGGVAMLFLLLQRNRPEDVGHPPVEPQAASEAVRYAGFRPEGGNGGSLQV
LAKVVRNRTVLCLGLAYFLLKPARYAILLWGPVIVYERMPALGKVGAAIVPTAFEVAGLL
GPILIGFASDKLFGARRMPACVISLLALTVCLALFVPAMTTGSIPIVVGLLFMMGLTLYG
PDSMICGSAAIDFGTSEAAGTASGFVNGCGSVGAILGGLLPGYFDTYTVFIGFTIAALIA
TAVLLPHWNSRPGGARESLRNIPSLADFRPIRS
>0501 Membrane sensor protein UhpC
MNNHNGTLHRGWQSLQRWRIQIFVITWLAYAAFYFTRKAFSVAKLGIAEDPSFELDKSAM
ADLDALYLAAYAVGQFMWGVFADRFGTRVVVLGGLLTSALAALVMGTFATLPIFAACMVV
QGLAQSTGWSGLCKNIGAFFATYERGRVLGLWSTCYAFGGLVATPFAGWCAYRLTHDWRM
AFLSSVGVVLAVAVLFFFLQRNRPQDVGLPPVEAEAAPPANAPRPSHSGALLKALRNPHV
LVLGLAYFLLKPARYAILLWGPVIIYERMPEIGKVASAIVPSAFEVAGLAGPILIGLASD
KLFGARRMPACVLSLAALTVSLALFVPAMQSGSLYLVVGLLFMMGVTLYGPDSMISGAAA
IDFGTSEAAGTATGFVNGCGSVGAILGGLLPGYFDTLTVFFVFTATALLASLLLVPFWNS
RPGACRVEPKAHAGGPLLAAGKPR
>0902 Glycerol-3-phosphate transporter glpt_1
MFGIFRPAPHQAPLPDAEVDSTYRRLRWQIFAGIFIGYAGYYLLRKNFSLAMPYLIEDGY
SRGQLGVAMSAIAIAYGLSKFIMGLVSDRSNPRVFLPFGLLVSAAVMFIFGFAHWATSSV
AIMFVLLFINGWAQGMGWPPSGRTMVHWWSQKERGSVVSVWNVAHNVGGGLIGPLFLLGL
ALFGDWRSAFYVPAIVAVGVAVFAYFAMRDTPQSCGLPPIEKHKDDYPEGYDEHHERELS
TKEIFVTYVLRNKLLWYIALANVFVYLLRYGVLDWAPTYLKEAKHFNVDKSSWAYFFYEW
AGIPGTLLCGWLSDKLFKGNRGATGVVFMILVTVGTLIYWLNPAGNPAIDMAALIMIGFL
IYGPVMLIGLQALELAPKKAAGTAAGFTGLFGYLGGSVAANALVGYTVDHFGWDGGFKLL
IGACLLAILFLCLTLRKPAVQAAPQQAGG
>0902 Glycerol-3-phosphate transporter glpt_2
MNQRPGTALPSSPVSSFQRWRLQIFAITWLAYAAFYFTRKAFSVAKLGIAEDPGFQLDKM
AMADLDAIYLAAYAVGQFTWGVLADRFGPRIVVFGGLLISALAAVVMGTFATLPIFATCM
VVQGLAQSTGWSGLCKNIGSFFATHERGRVLGLWSTCYAFGGLVASPFAGWWAYSVFGTW
HAAFYSSAAVVGGVALLFLLLQRNRPEDVGHPPVEPQVASEAVRYAGFRPEGGNGGSLQV
LAKVVRNRTVLCLGLAYFLLKPARYAILLWGPVIVYERMPALGKVGAAIVPTAFEVAGLL
GPILIGFASDKLFGARRMPACVISLLALTVCLALFVPAMTTGSIPIVVGLLFMMGLTLYG
PDSMICGSAAIDFGTGEAAGTASGFVNGCGSVGAILGGLLPGYFDTYTVFIGFTVAALIA
TAVLLPHWNSRPDGVVKGHRNIPSLGDFRPIRS
>0902 Membrane sensor protein UhpC
MNNHNGTLHRGWQSLQRWRIQIFVITWLAYAAFYFTRKAFSVAKLGIAEDPSFELDKSAM
ADLDALYLAAYAVGQFMWGVFADRFGTRVVVLGGLLTSALAALAMGTFATLPIFAACMVV
QGLAQSTGWSGLCKNIGAFFATYERGRVLGLWSTCYAFGGLVATPFAGWCAYRLTHDWRM
AFLSSAVVVLAVAVLFFFLQRNRPQDVGLPPVEAEAAPPANAPRPSHSGALLKALRNPHV
LVLGIAYFLLKPARYAILLWGPVIIYERMPEIGKVASAIVPSAFEVAGLAGPILIGLASD
KLFGARRMPACVLSLAALTLSLALFVPAMQSGSLYLVVGLLFMMGVTLYGPDSMISGAAA
IDFGTSEAAGTATGFVNGCGSVGAILGGLLPGYFDTLTVFFVFTATALLASLLLVPFWNS
RPGACRVEPKAHAGGPLLAAGKPR
>1001 Glycerol-3-phosphate transporter glpt_1
MFGIFRPAPHQAPLPDAEVDSTYRRLRWQIFAGIFIGYAGYYLLRKNFSLAMPYLIEDGY
SRGQLGVAMSAIAIAYGLSKFIMGLVSDRSNPRVFLPFGLLVSAAVMFIFGFAHWATSSV
AIMFVLLFINGWAQGMGWPPSGRTMVHWWSQKERGSVVSVWNVAHNVGGGLIGPLFLLGL
ALFGDWRSAFYVPAIVAVGVAVFAYFAMRDTPQSCGLPPIEKHKDDYPEGYDEHHERELS
TKEIFVTYVLRNKLLWYIALANVFVYLLRYGVLDWAPTYLKEAKHFNVDKSSWAYFFYEW
AGIPGTLLCGWLSDKLFKGNRGATGVVFMILVTVGTLIYWLNPAGNPAIDMAALIMIGFL
IYGPVMLIGLQALELAPKKAAGTAAGFTGLFGYLGGSVAANALVGYTVDHFGWDGGFKLL
IGACLLAILFLCLTLRKPAVQAAPQQAG
>1001 Glycerol-3-phosphate transporter glpt_2
MNQRPGTALPSSPVSSFQRWRLQIFAITWLAYAAFYFTRKAFSVAKLGIAEDPDFQLDKM
AMADLDAIYLAAYAVGQFTWGVLADRFGPRIVVFGGLLISALAALVMGTFATLPIFATCM
VVQGLAQSTGWSGLCKNIGSFFATHERGRVLGLWSTCYAFGGLVASPFAGWWAYSVFGTW
HAAFYSSAAVVGGVALLFLLLQRNRPEDVGHPPVEPQAASEAVRYAGFRPEGGNGGSLQV
LAKVVRNRTVLCLGLAYFLLKPARYAILLWGPVIVYERMPALGKVGAAIVPTAFEVAGLL
GPILIGFASDKLFGARRMPACVISLLALTVCLALFVPAMTTGSIPIVVGLLFMMGLTLYG
PDSMICGSAAIDFGTSEAAGTASGFVNGCGSVGAILGGLLPGYFDTYTVFIGFTIAALIA
TAVLLPHWNSRPGGARESLRNIPSLADFRPIRS
>1001 Membrane sensor protein UhpC
MNNHNGTLHRGWQSLQRWRIQIFVITWLAYAAFYFTRKAFSVAKLGIAEDPSFELDKSAM
ADLDALYLAAYAVGQFMWGVFADRFGTRVVVLGGLLTSALAALVMGTFATLPIFAACMVV
QGLAQSTGWSGLCKNIGAFFATYERGRVLGLWSTCYAFGGLVATPFAGWCAYRLTHDWRM
AFLSSAGVVLAVAVLFFFLQRNRPQDVGLPPVEAEAAPPANAPRPSHSGALLKALRNPHV
LVLGLAYFLLKPARYAILLWGPVIIYERMPEIGKVASAIVPSAFEVAGLAGPILIGLASD
KLFGARRMPACVLSLAALTVSLALFVPAMQSGSLYLVVGLLFMMGVTLYGPDSMISGAAA
IDFGTSEAAGTATGFVNGCGSVGAILGGLLPGYFDTLTVFFVFTATALLASLLLVPFWNS
RPGACRVEPKAHAGGPLLAAGKPR
>1102 Glycerol-3-phosphate transporter glpt_1
MFGIFRPAPHQAPLPDAEVDSTYRRLRWQIFAGIFIGYAGYYLLRKNFSLAMPYLIEDGY
SRGQLGVAMSAIAIAYGLSKFIMGLVSDRSNPRVFLPFGLLVSAAVMFIFGFAHWATSSV
AIMFVLLFINGWAQGMGWPPSGRTMVHWWSQKERGSVVSVWNVAHNVGGGLIGPLFLLGL
ALFGDWRSAFYVPAIVAVGVAVFAYFAMRDTPQSCGLPPIEKHKDDYPEGYDEHHERELS
TKEIFVTYVLRNKLLWYIALANVFVYLLRYGVLDWAPTYLKEAKHFNVDKSSWAYFFYEW
AGIPGTLLCGWLSDKLFKGNRGATGVVFMILVTVGTLIYWLNPAGNPAIDMAALIMIGFL
IYGPVMLIGLQALELAPKKAAGTAAGFTGLFGYLGGSVAANALVGYTVDHFGWDGGFKLL
IGACLLAILFLCLTLRKPAVQAAPQQAG
>1102 Glycerol-3-phosphate transporter glpt_2
MNQRPGTALPSSPVSSFQRWRLQIFAITWLAYAAFYFTRKAFSVAKLGIAEDPDFQLDKM
AMADLDAIYLAAYAVGQFTWGVLADRFGPRIVVFGGLLISALAALVMGTFATLPIFATCM
VVQGLAQSTGWSGLCKNIGSFFATHERGRVLGLWSTCYAFGGLVASPFAGWWAYSVFGTW
HAAFYSSAAVVGGVALLFLLLQRNRPEDVGHPPVEPQAASEAVRYAGFRPEGGNGGSLQV
LAKVVRNRTVLCLGLAYFLLKPARYAILLWGPVIVYERMPALGKVGAAIVPTAFEVAGLL
GPILIGFASDKLFGARRMPACVISLLALTVCLALFVPAMTTGSIPIVVGLLFMMGLTLYG
PDSMICGSAAIDFGTSEAAGTASGFVNGCGSVGAILGGLLPGYFDTYTVFIGFTIAALIA
TAVLLPHWNSRPGGARESLRNIPSLADFRPIRS
>1102 Membrane sensor protein UhpC
MNNHNGTLHRGWQSLQRWRIQIFVITWLAYAAFYFTRKAFSVAKLGIAEDPSFELDKSAM
ADLDALYLAAYAVGQFMWGVFADRFGTRVVVLGGLLTSALAALVMGTFATLPIFAACMVV
QGLAQSTGWSGLCKNIGAFFATYERGRVLGLWSTCYAFGGLVATPFAGWCAYRLTHDWRM
AFLSSAGVVLAVAVLFFFLQRNRPQDVGLPPVEAEAAPPANAPRPSHSGALLKALRNPHV
LVLGLAYFLLKPARYAILLWGPVIIYERMPEIGKVASAIVPSAFEVAGLAGPILIGLASD
KLFGARRMPACVLSLAALTVSLALFVPAMQSGSLYLVVGLLFMMGVTLYGPDSMISGAAA
IDFGTSEAAGTATGFVNGCGSVGAILGGLLPGYFDTLTVFFVFTATALLASLLLVPFWNS
RPGACRVEPKAHAGGPLLAAGKPR
>1201 Glycerol-3-phosphate transporter glpt_2
MNQRPGTALPSSPVSSFQRWRLQIFAITWLAYAAFYFTRKAFSVAKLGIAEDPGFQLDKM
AMADLDAIYLAAYAVGQFTWGVLADRFGPRIVVFGGLLISALAALVMGTFATLPIFATCM
VVQGLAQSTGWSGLCKNIGSFFATHERGRVLGLWSTCYAFGGLVASPFAGWWAYSVFGTW
HAAFYSSAAVVGGVALLFLLLQRNRPEDVGHQPVEPQVASEAVRYAGFRPEGGNGGNGGS
LQVLAKVVRNRTVLCLGLAYFLLKPARYAILLWGPVIVYERMPALGKVGAAIVPTAFEVA
GLLGPILIGFASDKLFGARRMPACVISLLALTVCLALFVPAMTTGSIPIVVGLLFMMGLT
LYGPDSMICGSAAIDFGTGEAAGTASGFVNGCGSVGAILGGLLPGYFDTYTVFIGFTVAA
LIATAVLLPHWNSRPDGVVKGHRNIPSLGDFRPIRS
>1201 Glycerol-3-phosphate transporter glpt_1
MFGIFRPAPHQAPLPDAEVDSTYRRLRWQIFAGIFIGYAGYYLLRKNFSLAMPYLIEDGY
SRGQLGVAMSAIAIAYGLSKFIMGLVSDRSNPRVFLPFGLLVSAAVMFIFGFAHWATSSV
AIMFVLLFINGWAQGMGWPPSGRTMVHWWSQKERGSVVSVWNVAHNVGGGLIGPLFLLGL
ALFGDWRSAFYVPAIVAVGVAVFAYFAMRDTPQSCGLPPIEKHKDDYPEGYDEHHERELS
TKEIFVTYVLRNKLLWYIALANVFVYLLRYGVLDWAPTYLKEAKHFNVDKSSWAYFFYEW
AGIPGTLLCGWLSDKLFKGNRGATGVVFMILVTVGTLIYWLNPAGNPAIDMAALIMIGFL
IYGPVMLIGLQALELAPKKAAGTAAGFTGLFGYLGGSVAANALVGYTVDHFGWDGGFKLL
IGACLLAILFLCLTLRKPAVQAAPQQAGG
>1201 Membrane sensor protein UhpC
MNNHNGTLHRGWQSLQRWRIQIFVITWLAYAAFYFTRKAFSVAKLGIAEDPSFELDKSAM
ADLDALYLAAYAVGQFMWGVFADRFGTRVVVLGGLLTSALAALAMGTFATLPIFAACMVV
QGLAQSTGWSGLCKNIGAFFATYERGRVLGLWSTCYAFGGLVATPFAGWCAYRLTHDWRM
AFLSSAVVVLAVAVLFFFLQRNRPQDVGLPPVEAEAAPPANAPRPSHSGALLKALRNPHV
LVLGIAYFLLKPARYAILLWGPVIIYERMPEIGKVASAIVPSAFEVAGLAGPILIGLASD
KLFGARRMPACVLSLAALTLSLALFVPAMQSGSLYLVVGLLFMMGVTLYGPDSMISGAAA
IDFGTSEAAGTATGFVNGCGSVGAILGGLLPGYFDTLTVFFVFTATALLASLLLVPFWNS
RPGARRVEPKAHAGGPLLAAGKPR
>1202 Glycerol-3-phosphate transporter glpt_2
MNQRPGTALPSSPVSSFQRWRLQIFAITWLAYAAFYFTRKAFSVAKLGIAEDPGFQLDKM
AMADLDAIYLAAYAVGQFTWGVLADRFGPRIVVFGGLLISALAALVMGTFATLPIFATCM
VVQGLAQSTGWSGLCKNIGSFFATHERGRVLGLWSTCYAFGGLVASPFAGWWAYSVFGTW
HAAFYSSAAVVGGVALLFLLLQRNRPEDVGHQPVEPQVASEAVRYAGFRPEGGNGGNGGS
LQVLAKVVRNRTVLCLGLAYFLLKPARYAILLWGPVIVYERMPALGKVGAAIVPTAFEVA
GLLGPILIGFASDKLFGARRMPACVISLLALTVCLALFVPAMTTGSIPIVVGLLFMMGLT
LYGPDSMICGSAAIDFGTGEAAGTASGFVNGCGSVGAILGGLLPGYFDTYTVFIGFTVAA
LIATAVLLPHWNSRPDGVVKGHRNIPSLGDFRPIRS
>1202 Glycerol-3-phosphate transporter glpt_1
MFGIFRPAPHQAPLPDAEVDSTYRRLRWQIFAGIFIGYAGYYLLRKNFSLAMPYLIEDGY
SRGQLGVAMSAIAIAYGLSKFIMGLVSDRSNPRVFLPFGLLVSAAVMFIFGFAHWATSSV
AIMFVLLFINGWAQGMGWPPSGRTMVHWWSQKERGSVVSVWNVAHNVGGGLIGPLFLLGL
ALFGDWRSAFYVPAIVAVGVAVFAYFAMRDTPQSCGLPPIEKHKDDYPEGYDEHHERELS
TKEIFVTYVLRNKLLWYIALANVFVYLLRYGVLDWAPTYLKEAKHFNVDKSSWAYFFYEW
AGIPGTLLCGWLSDKLFKGNRGATGVVFMILVTVGTLIYWLNPAGNPAIDMAALIMIGFL
IYGPVMLIGLQALELAPKKAAGTAAGFTGLFGYLGGSVAANALVGYTVDHFGWDGGFKLL
IGACLLAILFLCLTLRKPAVQAAPQQAGG
>1202 Membrane sensor protein UhpC
MNNHNGTLHRGWQSLQRWRIQIFVITWLAYAAFYFTRKAFSVAKLGIAEDPSFELDKSAM
ADLDALYLAAYAVGQFMWGVFADRFGTRVVVLGGLLTSALAALAMGTFATLPIFAACMVV
QGLAQSTGWSGLCKNIGAFFATYERGRVLGLWSTCYAFGGLVATPFAGWCAYRLTHDWRM
AFLSSAVVVLAVAVLFFFLQRNRPQDVGLPPVEAEAAPPANAPRPSHSGALLKALRNPHV
LVLGIAYFLLKPARYAILLWGPVIIYERMPEIGKVASAIVPSAFEVAGLAGPILIGLASD
KLFGARRMPACVLSLAALTLSLALFVPAMQSGSLYLVVGLLFMMGVTLYGPDSMISGAAA
IDFGTSEAAGTATGFVNGCGSVGAILGGLLPGYFDTLTVFFVFTATALLASLLLVPFWNS
RPGARRVEPKAHAGGPLLAAGKPR
>1402 Glycerol-3-phosphate transporter glpt_2
MNQRPGTALPSSPVSSFQRWRLQIFAITWLAYAAFYFTRKAFSVAKLGIAEDPGFQLDKM
AMADLDAIYLAAYAVGQFTWGVLADRFGPRIVVFGGLLISALAALVMGTFATLPIFATCM
VVQGLAQSTGWSGLCKNIGSFFATHERGRVLGLWSTCYAFGGLVASPFAGWWAYSVFGTW
HAAFYSSAAVVGGVALLFLLLQRNRPEDVGHPPVEPQVASEAVRYAGFRPEGGNGGSLQV
LAKVVRNRTVLCLGLAYFLLKPARYAILLWGPVIVYERMPALGKVGAAIVPTAFEVAGLL
GPILIGFASDKLFGARRMPACVISLLALTVCLALFVPAMTTGSIPIVVGLLFMMGLTLYG
PDSMICGSAAIDFGTGEAAGTASGFVNGCGSVGAILGGLLPGYFDTYTVFIGFTVAALIA
TAVLLPHWNSRPGGARESLRNIPSLADFRPIRS
>1402 Glycerol-3-phosphate transporter glpt_1
MFGIFRPAPHQAPLPDAEVDSTYRRLRWQIFAGIFIGYAGYYLLRKNFSLAMPYLIEDGY
SRGQLGVAMSAIAIAYGLSKFIMGLVSDRSNPRVFLPFGLLVSAAVMFIFGFAHWATSSV
AIMFVLLFINGWAQGMGWPPSGRTMVHWWSQKERGSVVSVWNVAHNVGGGLIGPLFLLGL
ALFGDWRSAFYVPAIVAVGVAVFACFAMRDTPQSCGLPPIEKHKDDYPEGYDEHHERELS
TKEIFVTYVLRNKLLWYIALANVFVYLLRYGVLDWAPTYLKEAKHFNVDKSSWAYFFYEW
AGIPGTLLCGWLSDKLFKGNRGATGVVFMILVTVGTLIYWLNPAGNPAIDMAALIMIGFL
IYGPVMLIGLQALELAPKKAAGTAAGFTGLFGYLGGSVAANALVGYTVDHFGWDGGFKLL
IGACLLAILFLCLTLRKPAVQAAPQQAG
>1402 Membrane sensor protein UhpC
MNNHNGTLHRGWQSLQRWRIQIFVITWLAYAAFYFTRKAFSVAKLGIAEDPSFELDKSAM
ADLDALYLAAYAVGQFMWGVFADRFGTRVVVLGGLLTSALAALVMGTFATLPIFAACMVV
QGLAQSTGWSGLCKNIGAFFATYERGRVLGLWSTCYAFGGLVATPFAGWCAYRLTHDWRM
AFLSSAGVVLAVAVLFFFLQRNRPQDVGLPPVEAEAAPPANAPRPSHSGALLKALRNPHV
LVLGIAYFLLKPARYAILLWGPVIIYERMPEIGKVASAIVPSAFEVAGLAGPILIGLASD
KLFGARRMPACVLSLAALTVSLALFVPAMQSGSLYLVVGLLFMMGVTLYGPDSMISGAAA
IDFGTSEAAGTATGFVNGCGSVGAILGGLLPGYFDTLTVFFVFTATALLASLLLVPFWNS
RPGACRVEPKAHAGGPLLAAGKPR
>1501 Glycerol-3-phosphate transporter glpt_2
MNQRPGTALPSSPVSSFQRWRLQIFAITWLAYAAFYFTRKAFSVAKLGIAEDPGFQLDKM
AMADLDAIYLAAYAVGQFTWGVLADRFGPRIVVFGGLLISALAALVMGTFATLPIFATCM
VVQGLAQSTGWSGLCKNIGSFFATHERGRVLGLWSTCYAFGGLVASPFAGWWAYSVFGTW
HAAFYSSAAVVGGVALLFLLLQRNRPEDVGHPPVEPQAASEAVRYAGFRPEGGNGGSLQV
LAKVVRNRTVLCLGLAYFLLKPARYAILLWGPVIVYERMPALGKVGAAIVPTAFEVAGLL
GPILIGFASDKLFGARRMPACVISLLALTVCLALFVPAMTTGSIPIVVGLLFMMGLTLYG
PDSMICGSAAIDFGTSEAAGTASGFVNGCGSVGAILGGLLPGYFDTYTVFIGFTIAALIA
TAVLLPHWNSRPGGARESLRNIPSLADFRPIRS
>1501 Glycerol-3-phosphate transporter glpt_1
MFGIFRPAPHQAPLPDAEVDSTYRRLRWQIFAGIFIGYAGYYLLRKNFSLAMPYLIEDGY
SRGQLGVAMSAIAIAYGLSKFIMGLVSDRSNPRVFLPFGLLVSAAVMFIFGFAHWATSSV
AIMFVLLFINGWAQGMGWPPSGRTMVHWWSQKERGSVVSVWNVAHNVGGGLIGPLFLLGL
ALFGDWRSAFYVPAIVAVGVAVFAYFAMRDTPQSCGLPPIEKHKDDYPEGYDEHHERELS
TKEIFVTYVLRNKLLWYIALANVFVYLLRYGVLDWAPTYLKEAKHFNVDKSSWAYFFYEW
AGIPGTLLCGWLSDKLFKGNRGATGVVFMILVTVGTLIYWLNPAGNPAIDMAALIMIGFL
IYGPVMLIGLQALELAPKKAAGTAAGFTGLFGYLGGSVAANALVGYTVDHFGWDGGFKLL
IGACLLAILFLCLTLRKPAVQAAPQQAGG
>1501 Membrane sensor protein UhpC
MNNHNGTLHRGWQSLQRWRIQIFVITWLAYAAFYFTRKAFSVAKLGIAEDPSFELDKSAM
ADLDALYLAAYAVGQFMWGVFADRFGTRVVVLGGLLTSALAALVMGTFATLPIFAACMVV
QGLAQSTGWSGLCKNIGAFFATYERGRVLGLWSTCYAFGGLVATPFAGWCAYRLTHDWRM
AFLSSAGVVLAVAVLFFFLQRNRPQDVGLPPVEAEAAPPANAPRPSHSGALLKALRNPHV
LVLGIAYFLLKPARYAILLWGPVIIYERMPEIGKVASAIVPSAFEVAGLAGPILIGLASD
KLFGARRMPACVLSLAALTLSLALFVPAMQSGSLYLVVGLLFMMGVTLYGPDSMISGAAA
IDFGTSEAAGTATGFVNGCGSVGAILGGLLPGYFDTLTVFFVFTATALLASLLLVPFWNS
RPGACRVEPKAHAGGPLLAAGKPR
>1602 Glycerol-3-phosphate transporter glpt_2
MNQRPGTALPSSPVSSFQRWRLQIFAITWLAYAAFYFTRKAFSVAKLGIAEDPGFQLDKM
AMADLDAIYLAAYAVGQFTWGVLADRFGPRIVVFGGLLISALAALVMGTFATLPIFATCM
VVQGLAQSTGWSGLCKNIGSFFATHERGRVLGLWSTCYAFGGLVASPFAGWWAYSVFGTW
HAAFYSSAAVVGGVALLFLLLQRNRPEDVGHPPVEPQAASEAVRYAGFRPEGGNGGSLQV
LAKVVRNRTVLCLGLAYFLLKPARYAILLWGPVIVYERMPALGKVGAAIVPTAFEVAGLL
GPILIGFASDKLFGARRMPACVISLLALTVCLALFVPAMTTGSIPIVVGLLFMMGLTLYG
PDSMICGSAAIDFGTSEAAGTASGFVNGCGSVGAILGGLLPGYFDTYTVFIGFTIAALIA
TAVLLPHWNSRPGGARESLRNIPSLADFRPIRS
>1602 Glycerol-3-phosphate transporter glpt_1
MFGIFRPAPHQAPLPDAEVDSTYRRLRWQIFAGIFIGYAGYYLLRKNFSLAMPYLIEDGY
SRGQLGVAMSAIAIAYGLSKFIMGLVSDRSNPRVFLPFGLLVSAAVMFIFGFAHWATSSV
AIMFVLLFINGWAQGMGWPPSGRTMVHWWSQKERGSVVSVWNVAHNVGGGLIGPLFLLGL
ALFGDWRSAFYVPAIVAVGVAVFAYFAMRDTPQSCGLPPIEKHKDDYPEGYDEHHERELS
TKEIFVTYVLRNKLLWYIALANVFVYLLRYGVLDWAPTYLKEAKHFNVDKSSWAYFFYEW
AGIPGTLLCGWLSDKLFKGNRGATGVVFMILVTVGTLIYWLNPAGNPAIDMAALIMIGFL
IYGPVMLIGLQALELAPKKAAGTAAGFTGLFGYLGGSVAANALVGYTVDHFGWDGGFKLL
IGACLLAILFLCLTLRKPAVQAAPQQAGG
>1602 Membrane sensor protein UhpC
MNNHNGTLHRGWQSLQRWRIQIFVITWLAYAAFYFTRKAFSVAKLGIAEDPSFELDKSAM
ADLDALYLAAYAVGQFMWGVFADRFGTRVVVLGGLLTSALAALVMGTFATLPIFAACMVV
QGLAQSTGWSGLCKNIGAFFATYERGRVLGLWSTCYAFGGLVATPFAGWCAYRLTHDWRM
AFLSSAGVVLAVAVLFFFLQRNRPQDVGLPPVEAEAAPPANAPRPSHSGALLKALRNPHV
LVLGIAYFLLKPARYAILLWGPVIIYERMPEIGKVASAIVPSAFEVAGLAGPILIGLASD
KLFGARRMPACVLSLAALTLSLALFVPAMQSGSLYLVVGLLFMMGVTLYGPDSMISGAAA
IDFGTSEAAGTATGFVNGCGSVGAILGGLLPGYFDTLTVFFVFTATALLASLLLVPFWNS
RPGACRVEPKAHAGGPLLAAGKPR
>1703 Glycerol-3-phosphate transporter glpt_1
MFGIFRPAPHQAPLPDAEVDSTYRRLRWQIFAGIFIGYAGYYLLRKNFSLAMPYLIEDGY
SRGQLGVAMSAIAIAYGLSKFIMGLVSDRSNPRVFLPFGLLVSAAVMFIFGFAHWATSSV
AIMFVLLFINGWAQGMGWPPSGRTMVHWWSQKERGSVVSVWNVAHNVGGGLIGPLFLLGL
ALFGDWRSAFYVPAIVAVGVAVFAYFAMRDTPQSCGLPPIEKHKDDYPEGYDEHHERELS
TKEIFVTYVLRNKLLWYIALANVFVYLLRYGVLDWAPTYLKEAKHFNVDKSSWAYFFYEW
AGIPGPLLCGWLSDKLFKGNRGATGVVFMILVTVGTLIYWLNPAGNPAIDMAALIMIGFL
IYGPVMLIGLQALELAPKKAAGTAAGFTGLFGYLGGSVAANALVGYTVDHFGWDGGFKLL
IGACLLAILFLCLTLRKPAVQAAPQQAGG
>1703 Glycerol-3-phosphate transporter glpt_2
MNQRPGTALPSSPVSSFQRWRLQIFAITWLAYAAFYFTRKAFSVAKLGIAEDPGFQLDKM
AMADLDAIYLAAYAVGQFTWGVLADRFGPRIVVFGGLLISALAAVVMGTFATLPIFATCM
VVQGLAQSTGWSGLCKNIGSFFATHERGRVLGLWSTCYAFGGLVASPFAGWWAYSVFGTW
HAAFYSSAAVVGGVALLFLLLQRNRPEDVGHPPVEPQVASEAVRYAGFRPEGGNGGSLQV
LAKVVRNRTVLCLGLAYFLLKPARYAILLWGPVIVYERMPALGKVGAAIVPTAFEVAGLL
GPILIGFASDKLFGARRMPACVISLLALTVCLALFVPAMTTGSIPIVVGLLFMMGLTLYG
PDSMICGSAAIDFGTGEAAGTASGFVNGCGSVGAILGGLLPGYFDTYTVFIGFTVAALIA
TAVLLPHWNSRPDGVVKGHRNIPSLGDFRPIRS
>1703 Membrane sensor protein UhpC
MNNHNGTLHRGWQSLQRWRIQIFVITWLAYAAFYFTRKAFSVAKLGIAEDPSFELDKSAM
ADLDALYLAAYAVGQFMWGVFADRFGTRVVVLGGLLTSALAALAMGTFATLPIFAACMVV
QGLAQSTGWSGLCKNIGAFFATYERGRVLGLWSTCYAFGGLVATPFAGWCAYRLTHDWRM
AFLSSAGVVLAVAVLFFFLQRNRPQDVGLPPVEAEAAPPANAPRPSHSGALLKALRNPHV
LVLGIAYFLLKPARYAILLWGPVIIYERMPEIGKVASAIVPSAFEVAGLAGPILIGLASD
KLFGARRMPACVLSLAALTLSLALFVPAMQSGSLYLVVGLLFMMGVTLYGPDSMISGAAA
IDFGTSEAAGTATGFVNGCGSVGAILGGLLPGYFDTLTVFFVFTATALLASLLLVPFWNS
RPGARRVEPKAHAGGPLLAAGKPR
>1801 Glycerol-3-phosphate transporter glpt_2
MNQRPGTALPSYPVSSFQRWRLQIFAITWLAYAAFYFTRKAFSVAKLGIAEDPGFQLDKM
AMADLDAIYLAAYAVGQFTWGVLADRFGPRIVVFGGLLISALAALVMGTFATLPIFATCM
VVQGLAQSTGWSGLCKNIGSFFATHERGRVLGLWSTCYAFGGLVASPFAGWWAYSVFGTW
HAAFYSSAAVVGGVALLFLLLQRNRPEDVGHPPVEPQVASEAVRYAGFRPEGGNGGSLQV
LAKVVRNRTVLCLGLAYFLLKPARYAILLWGPVIVYERMPALGKVGAAIVPTAFEVAGLL
GPILIGFASDKLFGARRMPACVISLLALTVCLALFVPAMTTGSIPIVVGLLFMMGLTLYG
PDSMICGSAAIDFGTGEAAGTASGFVNGCGSVGAILGGLLPGYFDTYTVFIGFTVAALIA
TAVLLPHWNSRPDGVVKGHRNIPSLGDFRPIRS
>1801 Glycerol-3-phosphate transporter glpt_1
MFGIFRPAPHQAPLPDAEVDSTYRRLRWQIFAGIFIGYAGYYLLRKNFSLAMPYLIEDGY
SRGQLGVAMSAIAIAYGLSKFIMGLVSDRSNPRVFLPFGLLVSAAVMFIFGFAHWATSSV
AIMFVLLFINGWAQGMGWPPSGRTMVHWWSQKERGSVVSVWNVAHNVGGGLIGPLFLLGL
ALFGDWRSAFYVPAIVAVGVAVFAYFAMRDTPQSCGLPPIEKHKDDYPEGYDEHHERELS
TKEIFVTYVLRNKLLWYIALANVFVYLLRYGVLDWAPTYLKEAKHFNVDKSSWAYFFYEW
AGIPGTLLCGWLSDKLFKGNRGATGVVFMILVTVGTLIYWLNPAGNPAIDMAALIMIGFL
IYGPVMLIGLQALELAPKKAAGTAAGFTGLFGYLGGSVAANALVGYTVDHFGWDGGFKLL
IGACLLAILFLCLTLRKPAVQAAPQQAGG
>1801 Membrane sensor protein UhpC
MNNHNGTLHRGWQSLQRWRIQIFVITWLAYAAFYFTRKAFSVAKLGIAEDPSFELDKSAM
ADLDALYLAAYAVGQFMWGVFADRFGTRVVVLGGLLTSALAALAMGTFATLPIFAACMVV
QGLAQSTGWSGLCKNIGAFFATYERGRVLGLWSTCYAFGGLVATPFAGWCAYRLTHDWRM
AFLSSAGVVLAVAVLFFFLQRNRPQDVGLPPVEAEAAPPANAPRPSHSGALLKALRNPHV
LVLGIAYFLLKPARYAILLWGPVIIYERMPEIGKVASAIVPSAFEVAGLAGPILIGLASD
KLFGARRMPACVLSLAALTLSLALFVPAMQSGSLYLVVGLLFMMGVTLYGPDSMISGAAA
IDFGTSEAAGTATGFVNGCGSVGAILGGLLPGYFDTLTVFFVFTATALLASLLLVPFWNS
RPGARRVEPKAHAGGPLLAAGKPR
>1901 Glycerol-3-phosphate transporter glpt_2
MNQRPGTALPSSPVSSFQRWRLQIFAITWLAYAAFYFTRKAFSVAKLGIAEDPGFQLDKM
AMADLDAIYLAAYAVGQFTWGVLADRFGPRIVVFGGLLISALAAVVMGTFATLPIFATCM
VVQGLAQSTGWSGLCKNIGSFFATHERGRVLGLWSTCYAFGGLVASPFAGWWAYSVFGTW
HAAFYSSAAVVGGVALLFLLLQRNRPEDVGHPPVEPQVASEAVRYAGFRPEGGNGGSLQV
LAKVVRNRTVLCLGLAYFLLKPARYAILLWGPVIVYERMPALGKVGAAIVPTAFEVAGLL
GPILIGFASDKLFGARRMPACVISLLALTVCLALFVPAMTTGSIPIVVGLLFMMGLTLYG
PDSMICGSAAIDFGTGEAAGTASGFVNGCGSVGAILGGLLPGYFDTYTVFIGFTVAALIA
TAVLLPHWNSRPDGVVKGHRNIPSLGDFRPIRS
>1901 Glycerol-3-phosphate transporter glpt_1
MFGIFRPAPHQAPLPDAEVDSTYRRLRWQIFAGIFIGYAGYYLLRKNFSLAMPYLIEDGY
SRGQLGVAMSAIAIAYGLSKFIMGLVSDRSNPRVFLPFGLLVSAAVMFIFGFAHWATSSV
AIMFVLLFINGWAQGMGWPPSGRTMVHWWSQKERGSVVSVWNVAHNVGGGLIGPLFLLGL
ALFGDWRSAFYVPAIVAVGVAVFAYFAMRDTPQSCGLPPIEKHKDDYPEGYDEHHERELS
TKEIFVTYVLRNKLLWYIALANVFVYLLRYGVLDWAPTYLKEAKHFNVDKSSWAYFFYEW
AGIPGTLLCGWLSDKLFKGNRGATGVVFMILVTVGTLIYWLNPAGNPAIDMAALIMIGFL
IYGPVMLIGLQALELAPKKAAGTAAGFTGLFGYLGGSVAANALVGYTVDHFGWDGGFKLL
IGACLLAILFLCLTLRKPAVQAAPQQAG
>1901 Membrane sensor protein UhpC
MNNHNGTLHRGWQSLQRWRIQIFVITWLAYAAFYFTRKAFSVAKLGIAEDPSFELDKSAM
ADLDALYLAAYAVGQFMWGVFADRFGTRVVVLGGLLTSALAALAMGTFATLPIFAACMVV
QGLAQSTGWSGLCKNIGAFFATYERGRVLGLWSTCYAFGGLVATPFAGWCAYRLTHDWRM
AFLSSAGVVLAVAVLFFFLQRNRPQDVGLPPVEAEAAPPANAPRPSHSGALLKALRNPHV
LVLGIAYFLLKPARYAILLWGPVIIYERMPEIGKVASAIVPSAFEVAGLAGPILIGLASD
KLFGARRMPACVLSLAALTLSLALFVPAMQSGSLYLVVGLLFMMGVTLYGPDSMISGAAA
IDFGTSEAAGTATGFVNGCGSVGAILGGLLPGYFDTLTVFFVFTATALLASLLLVPFWNS
RPGARRVEPKAHAGGPLLAAGKPR
>2001 Glycerol-3-phosphate transporter glpt_1
MFGIFRPAPHQAPLPDAEVDSTYRRLRWQIFAGIFIGYAGYYLLRKNFSLAMPYLIEDGY
SRGQLGVAMSAIAIAYGLSKFIMGLVSDRSNPRVFLPFGLLVSAAVMFIFGFAHWATSSV
AIMFVLLFINGWAQGMGWPPSGRTMVHWWSQKERGSVVSVWNVAHNVGGGLIGPLFLLGL
ALFGDWRSAFYVPAIVAVGVAVFAYFAMRDTPQSCGLPPIEKHKDDYPEGYDEHHERELS
TKEIFVTYVLRNKLLWYIALANVFVYLLRYGVLDWAPTYLKEAKHFNVDKSSWAYFFYEW
AGIPGTLLCGWLSDKLFKGNRGATGVVFMILVTVGTLIYWLNPAGNPAIDMAALIMIGFL
IYGPVMLIGLQALELAPKKAAGTAAGFTGLFGYLGGSVAANALVGYTVDHFGWDGGFKLL
IGACLLAILFLCLTLRKPAVQAAPQQAG
>2001 Glycerol-3-phosphate transporter glpt_2
MNQHPGTALPSSPVSSFQRWRLQIFAITWLAYAAFYFTRKAFSVAKLGIAEDPDFQLDKM
AMADLDAIYLAAYAVGQFTWGVLADRFGPRIVVFGGLLISALAALVMGTFATLPIFATCM
VVQGLAQSTGWSGLCKNIGSFFATHERGRVLGLWSTCYAFGGLVASPFAGWWAYSVFGTW
HAAFYSSAAVVGGVALLFLLLQRNRPEDVGHPPVEPQAASEAVRYAGFRPEGGNGGSLQV
LAKVVRNRTVLCLGLAYFLLKPARYAILLWGPVIVYERMPALGKVGAAIVPTAFEVAGLL
GPILIGFASDKLFGARRMPACVISLLALTVCLALFVPAMTTGSIPIVVGLLFMMGLTLYG
PDSMICGSAAIDFGTSEAAGTASGFVNGCGSVGAILGGLLPGYFDTYTVFIGFTIAALIA
TAVLLPHWNSRPGGARESLRNIPSLADFRPIRS
>2001 Membrane sensor protein UhpC
MNNHNGTLHRGWQSLQRWRIQIFVITWLAYAAFYFTRKAFSVAKLGIAEDPSFELDKSAM
ADLDALYLAAYAVGQFMWGVFADRFGTRVVVLGGLLTSALAALAMGTFATLPIFAACMVV
QGLAQSTGWSGLCKNIGAFFATYERGRVLGLWSTCYAFGGLVATPFAGWCAYRLTHDWRM
AFLSSAGVVLAVAVLFFFLQRNRPQDVGLPPVEAEAAPPANAPRPSHSGALLKALRNPHV
LVLGLAYFLLKPARYAILLWGPVIIYERMPEIGKVASAIVPSAFEVAGLAGPILIGLASD
KLFGARRMPACVLSLAALTVSLALFVPAMQSGSLYLVVGLLFMMGVTLYGPDSMISGAAA
IDFGTSEAAGTATGFVNGCGSVGAILGGLLPGYFDTLTVFFVFTATALLASLLLVPFWNS
RPGACRVEPKAHAGGPLLAAGKPR
>2102 Glycerol-3-phosphate transporter glpt_1
MFGIFRPAPHQAPLPDAEVDSTYRRLRWQIFAGIFIGYAGYYLLRKNFSLAMPYLIEDGY
SRGQLGVAMSAIAIAYGLSKFIMGLVSDRSNPRVFLPFGLLVSAAVMFIFGFAHWATSSV
AIMFVLLFINGWAQGMGWPPSGRTMVHWWSQKERGSVVSVWNVAHNVGGGLIGPLFLLGL
ALFGDWRSAFYVPAIVAVGVAVFAYFAMRDTPQSCGLPPIEKHKDDYPEGYDEHHERELS
TKEIFVTYVLRNKLLWYIALANVFVYLLRYGVLDWAPTYLKEAKHFNVDKSSWAYFFYEW
AGIPGTLLCGWLSDKLFKGNRGATGVVFMILVTVGTLIYWLNPAGNPAIDMAALIMIGFL
IYGPVMLIGLQALELAPKKAAGTAAGFTGLFGYLGGSVAANALVGYTVDHFGWDGGFKLL
IGACLLAILFLCLTLRKPAVQAAPQQAG
>2102 Glycerol-3-phosphate transporter glpt_2
MNQHPGTALPSSPVSSFQRWRLQIFAITWLAYAAFYFTRKAFSVAKLGIAEDPDFQLDKM
AMADLDAIYLAAYAVGQFTWGVLADRFGPRIVVFGGLLISALAALVMGTFATLPIFATCM
VVQGLAQSTGWSGLCKNIGSFFATHERGRVLGLWSTCYAFGGLVASPFAGWWAYSVFGTW
HAAFYSSAAVVGGVALLFLLLQRNRPEDVGHPPVEPQAASEAVRYAGFRPEGGNGGSLQV
LAKVVRNRTVLCLGLAYFLLKPARYAILLWGPVIVYERMPALGKVGAAIVPTAFEVAGLL
GPILIGFASDKLFGARRMPACVISLLALTVCLALFVPAMTTGSIPIVVGLLFMMGLTLYG
PDSMICGSAAIDFGTSEAAGTASGFVNGCGSVGAILGGLLPGYFDTYTVFIGFTIAALIA
TAVLLPHWNSRPGGARESLRNIPSLADFRPIRS
>2102 Membrane sensor protein UhpC
MNNHNGTLHRGWQSLQRWRIQIFVITWLAYAAFYFTRKAFSVAKLGIAEDPSFELDKSAM
ADLDALYLAAYAVGQFMWGVFADRFGTRVVVLGGLLTSALAALAMGTFATLPIFAACMVV
QGLAQSTGWSGLCKNIGAFFATYERGRVLGLWSTCYAFGGLVATPFAGWCAYRLTHDWRM
AFLSSAGVVLAVAVLFFFLQRNRPQDVGLPPVEAEAAPPANAPRPSHSGALLKALRNPHV
LVLGLAYFLLKPARYAILLWGPVIIYERMPEIGKVASAIVPSAFEVAGLAGPILIGLASD
KLFGARRMPACVLSLAALTVSLALFVPAMQSGSLYLVVGLLFMMGVTLYGPDSMISGAAA
IDFGTSEAAGTATGFVNGCGSVGAILGGLLPGYFDTLTVFFVFTATALLASLLLVPFWNS
RPGACRVEPKAHAGGPLLAAGKPR
>2201 Glycerol-3-phosphate transporter glpt_1
MFGIFRPAPHQAPLPDAEVDSTYRRLRWQIFAGIFIGYAGYYLLRKNFSLAMPYLIEDGY
SRGQLGVAMSAIAIAYGLSKFIMGLVSDRSNPRVFLPFGLLVSAAVMFIFGFAHWATSSV
AIMFVLLFINGWAQGMGWPPSGRTMVHWWSQKERGSVVSVWNVAHNVGGGLIGPLFLLGL
ALFGDWRSAFYVPAIVAVGVAVFAYFAMRDTPQSCGLPPIEKHKDDYPEGYDEHHERELS
TKEIFVTYVLRNKLLWYIALANVFVYLLRYGVLDWAPTYLKEAKHFNVDKSSWAYFFYEW
AGIPGTLLCGWLSDKLFKGNRGATGVVFMILVTVGTLIYWLNPAGNPAIDMAALIMIGFL
IYGPVMLIGLQALELAPKKAAGTAAGFTGLFGYLGGSVAANALVGYTVDHFGWDGGFKLL
IGACLLAILFLCLTLRKPAVQAAPQQAG
>2201 Glycerol-3-phosphate transporter glpt_2
MNQRPGTALPSSPVSSFQRWRLQIFAITWLAYAAFYFTRKAFSVAKLGIAEDPGFQLDKM
AMADLDAIYLAAYAVGQFTWGVLADRFGPRIVVFGGLLISALAALVMGTFATLPIFATCM
VVQGLAQSTGWSGLCKNIGSFFATHERGRVLGLWSTCYAFGGLVASPFAGWWAYSVFGTW
HAAFYSSAAVVGGVALLFLLLQRNRPEDVGHPPVEPQVASEAVRYAGFRPEGGNGGNGGN
GGNGGSLQVLAKVVRNRTVLCLGLAYFLLKPARYAILLWGPVIVYERMPALGKVGAAIVP
TAFEVAGLLGPILIGFASDKLFGARRMPACVISLLALTVCLALFVPAMTTGSIPIVVGLL
FMMGLTLYGPDSMICGSAAIDFGTGEAAGTASGFVNGCGSVGAILGGLLPGYFDTYTVFI
GFTVAALIATAVLLPHWNSRPDGVVKGHRNIPSLGDFRPIRS
>2201 Membrane sensor protein UhpC
MNNHNGTLHRGWQSLQRWRIQIFVITWLAYAAFYFTRKAFSVAKLGIAEDPSFELDKSAM
ADLDALYLAAYAVGQFMWGVFADRFGTRVVVLGGLLTSALAALAMGTFATLPIFAACMVV
QGLAQSTGWSGLCKNIGAFFATYERGRVLGLWSTCYAFGGLVATPFAGWCAYRLTHDWRM
AFLSSAGVVLAVAVLFFFLQRNRPQDVGLPPVEAEAAPPANAPRPSHSGALLKALRNPHV
LVLGIAYFLLKPARYAILLWGPVIIYERMPEIGKVASAIVPSAFEVAGLAGPILIGLASD
KLFGARRMPACVLSLAALTLSLALFVPAMQSGSLYLVVGLLFMMGVTLYGPDSMISGAAA
IDFGTSEAAGTATGFVNGCGSVGAILGGLLPGYFDTLTVFFVFTATALLASLLLVPFWNS
RPGARRVEPKAHAGGPLLAAGKPR
>2301 Glycerol-3-phosphate transporter glpt_1
MFGIFRPAPHQAPLPDAEVDSTYRRLRWQIFAGIFIGYAGYYLLRKNFSLAMPYLIEDGY
SRGQLGVAMSAIAIAYGLSKFIMGLVSDRSNPRVFLPFGLLVSAAVMFIFGFAHWATSSV
AIMFVLLFINGWAQGMGWPPSGRTMVHWWSQKERGSVVSVWNVAHNVGGGLIGPLFLLGL
ALFGDWRSAFYVPAIVAVGVAVFAYFAMRDTPQSCGLPPIEKHKDDYPEGYDEHHERELS
TKEIFVTYVLRNKLLWYIALANVFVYLLRYGVLDWAPTYLKEAKHFNVDKSSWAYFFYEW
AGIPGTLLCGWLSDKLFKGNRGATGVVFMILVTVGTLIYWLNPAGNPAIDMAALIMIGFL
IYGPVMLIGLQALELAPKKAAGTAAGFTGLFGYLGGSVAANALVGYTVDHFGWDGGFKLL
IGACLLAILFLCLTLRKPAVQAAPQQAG
>2301 Glycerol-3-phosphate transporter glpt_2
MNQRPGTALPSSPVSSFQRWRLQIFAITWLAYAAFYFTRKAFSVAKLGIAEDPGFQLDKM
AMADLDAIYLAAYAVGQFTWGVLADRFGPRIVVFGGLLISALAALVMGTFATLPIFATCM
VVQGLAQSTGWSGLCKNIGSFFATHERGRVLGLWSTCYAFGGLVASPFAGWWAYSVFGTW
HAAFYSSAAVVGGVALLFLLLQRNRPEDVGHPPVEPQVASEAVRYAGFRPEGGNGGSLQV
LAKVVRNRTVLCLGLAYFLLKPARYAILLWGPVIVYERMPALGKVGAAIVPTAFEVAGLL
GPILIGFASDKLFGARRMPACVISLLALTVCLALFVPAMTTGSIPIVVGLLFMMGLTLYG
PDSMICGSAAIDFGTSEAAGTASGFVNGCGSVGAILGGLLPGYFDTYTVFIGFTIAALIA
TAVLLPHWNSRPGGARESLRNIPSLADFRPIRS
>2301 Membrane sensor protein UhpC
MNNHNGTLHRGWQSLQRWRIQIFVITWLAYAAFYFTRKAFSVAKLGIAEDPSFELDKSAM
ADLDALYLAAYAVGQFMWGVFADRFGTRVVVLGGLLTSALAALAMGTFATLPIFAACMVV
QGLAQSTGWSGLCKNIGAFFATYERGRVLGLWSTCYAFGGLVATPFAGWCAYRLTHDWRM
AFLSSAGVVLAVAVLFFFLQRNRPQDVGLPPVETEAAPPANAPRPNHSGALLKALRNPHV
LVLGIAYFLLKPARYAILLWGPVIIYERMPEIGKVASAIVPSAFEVAGLAGPILIGLASD
KLFGARRMPACVLSLAALTVSLALFVPAMQSGSLYLVVSLLFMMGVTLYGPDSMISGAAA
IDFGTSEAAGTATGFVNGCGSVGAILGGLLPGYFDTLTVFFVFTATALLASLLLVPFWNS
RPGACRVEPKAHAGGPLLAAGKPR
>2402 Glycerol-3-phosphate transporter glpt_1
MFGIFRPAPHQAPLPDAEVDSTYRRLRWQIFAGIFIGYAGYYLLRKNFSLAMPYLIEDGY
SRGQLGVAMSAIAIAYGLSKFIMGLVSDRSNPRVFLPFGLLVSAAVMFIFGFAHWATSSV
AIMFVLLFINGWAQGMGWPPSGRTMVHWWSQKERGSVVSVWNVAHNVGGGLIGPLFLLGL
ALFGDWRSAFYVPAIVAVGVAVFAYFAMRDTPQSCGLPPIEKHKDDYPEGYDEHHERELS
TKEIFVTYVLRNKLLWYIALANVFVYLLRYGVLDWAPTYLKEAKHFNVDKSSWAYFFYEW
AGIPGTLLCGWLSDKLFKGNRGATGVVFMILVTVGTLIYWLNPAGNPAIDMAALIMIGFL
IYGPVMLIGLQALELAPKKAAGTAAGFTGLFGYLGGSVAANALVGYTVDHFGWDGGFKLL
IGACLLAILFLCLTLRKPAVQAAPQQAG
>2402 Glycerol-3-phosphate transporter glpt_2
MNQRPGTALPSSPVSSFQRWRLQIFAITWLAYAAFYFTRKAFSVAKLGIAEDPGFQLDKM
AMADLDAIYLAAYAVGQFTWGVLADRFGPRIVVFGGLLISALAALVMGTFATLPIFATCM
VVQGLAQSTGWSGLCKNIGSFFATHERGRVLGLWSTCYAFGGLVASPFAGWWAYSVFGTW
HAAFYSSAAVVGGVALLFLLLQRNRPEDVGHPPVEPQVASEAVRYAGFRPEGGNGGSLQV
LAKVVRNRTVLCLGLAYFLLKPARYAILLWGPVIVYERMPALGKVGAAIVPTAFEVAGLL
GPILIGFASDKLFGARRMPACVISLLALTVCLALFVPAMTTGSIPIVVGLLFMMGLTLYG
PDSMICGSAAIDFGTSEAAGTASGFVNGCGSVGAILGGLLPGYFDTYTVFIGFTIAALIA
TAVLLPHWNSRPGGARESLRNIPSLADFRPIRS
>2402 Membrane sensor protein UhpC
MNNHNGTLHRGWQSLQRWRIQIFVITWLAYAAFYFTRKAFSVAKLGIAEDPSFELDKSAM
ADLDALYLAAYAVGQFMWGVFADRFGTRVVVLGGLLTSALAALAMGTFATLPIFAACMVV
QGLAQSTGWSGLCKNIGAFFATYERGRVLGLWSTCYAFGGLVATPFAGWCAYRLTHDWRM
AFLSSAGVVLAVAVLFFFLQRNRPQDVGLPPVETEAAPPANAPRPNHSGALLKALRNPHV
LVLGIAYFLLKPARYAILLWGPVIIYERMPEIGKVASAIVPSAFEVAGLAGPILIGLASD
KLFGARRMPACVLSLAALTVSLALFVPAMQSGSLYLVVSLLFMMGVTLYGPDSMISGAAA
IDFGTSEAAGTATGFVNGCGSVGAILGGLLPGYFDTLTVFFVFTATALLASLLLVPFWNS
RPGACRVEPKAHAGGPLLAAGKPR
